# Supplementary material for: Synthesis, antimicrobial and ergosterol biosynthesis inhibition activity of clubbed 1,1′-biphenyl-pyrazole derivatives
Source: Royal Society of Chemistry journal article supplement (doi:10.1039/d2nj04449h), 2023-01-01
Supplement: d2nj04449h1.pdf [file d2nj04449h1.pdf]

## Synthesis, antimicrobial and ergosterol biosynthesis inhibition activity of clubbed 1,1'-biphenyl-pyrazole derivatives

Yogesh Walunj,<sup>a,b</sup> Yogesh Nandurkar,<sup>ac</sup> Abhijit Shinde,<sup>a</sup> Shivaji Jagadale,<sup>ad</sup> Abdul Latif N. Shaikh,<sup>ac</sup> Manisha Modak,<sup>f</sup> Vivek D Bobade,<sup>g</sup> Pravin C. Mhaske<sup>a\*</sup>

<sup>a</sup>Post-Graduate Department of Chemistry, S. P. Mandali's Sir Parashurambhau College, Tilak Road, Pune, India 411 030, (Affiliated to Savitribai Phule Pune University).

<sup>b</sup>Department of Chemistry, Hutatma Rajguru Mahavidyalaya, Rajgurunagar, Pune-410505, India.

<sup>c</sup>Department of Chemistry, Nowrosjee Wadia College, Pune (Affiliated to Savitribai Phule Pune University).

<sup>d</sup>Department of Chemistry, S.K. Gandhi Arts, Amolak Science and P.H. Gandhi Commerce College Kada, Tal. Ashti, District Beed, India 414202

<sup>e</sup>Department of Chemistry, Jijamata College of Science and Arts, Bhende, Dist. Ahmednagar (Affiliated to Savitribai Phule Pune University).

<sup>f</sup>Department of Zoology, S. P. Mandali's Sir Parashurambhau College, Tilak Road, Pune, India 411 030, (Affiliated to Savitribai Phule Pune University).

<sup>g</sup>Post-Graduate Department of Chemistry H. P. T. Arts and R. Y. K. Science College, Nashik India 422005 (Affiliated to Savitribai Phule Pune University).

### Corresponding author

Pravin C Mhaske (Email: [mhaskepc18@gmail.com](mailto:mhaskepc18@gmail.com))

Table S1: Representative petri plates images of the antimicrobial activity of synthesized 1,1'-biphenyl-pyrazole derivatives

| Petri plate no. | Compd. No | <i>P. mirabilis</i>                                                                 | <i>S. albus</i>                                                                     | <i>C. Albicans</i>                                                                   | <i>A. Niger</i>                                                                       |
|-----------------|-----------|-------------------------------------------------------------------------------------|-------------------------------------------------------------------------------------|--------------------------------------------------------------------------------------|---------------------------------------------------------------------------------------|
| 39              | 5a        |                                                                                     |    |    |    |
| 40              | 5b        |                                                                                     |    |    |    |
| 09              | 5c        |   |   |   |   |
| 38              | 5d        |                                                                                     |  |  |  |
| 08              | 5e        |  |  |  |  |
| 02              | 5f        |  |  |  |  |

|    |    |                                                                                     |                                                                                     |                                                                                      |                                                                                       |
|----|----|-------------------------------------------------------------------------------------|-------------------------------------------------------------------------------------|--------------------------------------------------------------------------------------|---------------------------------------------------------------------------------------|
| 01 | 5g |    |    |    |    |
| 10 | 6a |    |    |    |    |
| 14 | 6b |    |    |    |    |
| 15 | 6c |   |   |   |   |
| 16 | 6d |  |  |  |  |
| 05 | 6e |  |  |  |  |
| 17 | 9a |  |  |  |                                                                                       |

|    |     |                                                                                     |                                                                                     |                                                                                      |                                                                                       |
|----|-----|-------------------------------------------------------------------------------------|-------------------------------------------------------------------------------------|--------------------------------------------------------------------------------------|---------------------------------------------------------------------------------------|
| 34 | 9b  |                                                                                     |    |    |                                                                                       |
| 35 | 9c  |                                                                                     |    |    |    |
| 13 | 10a |    |    |    |    |
| 12 | 10b |   |   |   |   |
| 36 | 10c |  |  |  |  |
| 03 | 11a |  |                                                                                     |  |                                                                                       |
| 06 | 11c |  |  |  |  |

## Representative spectral data

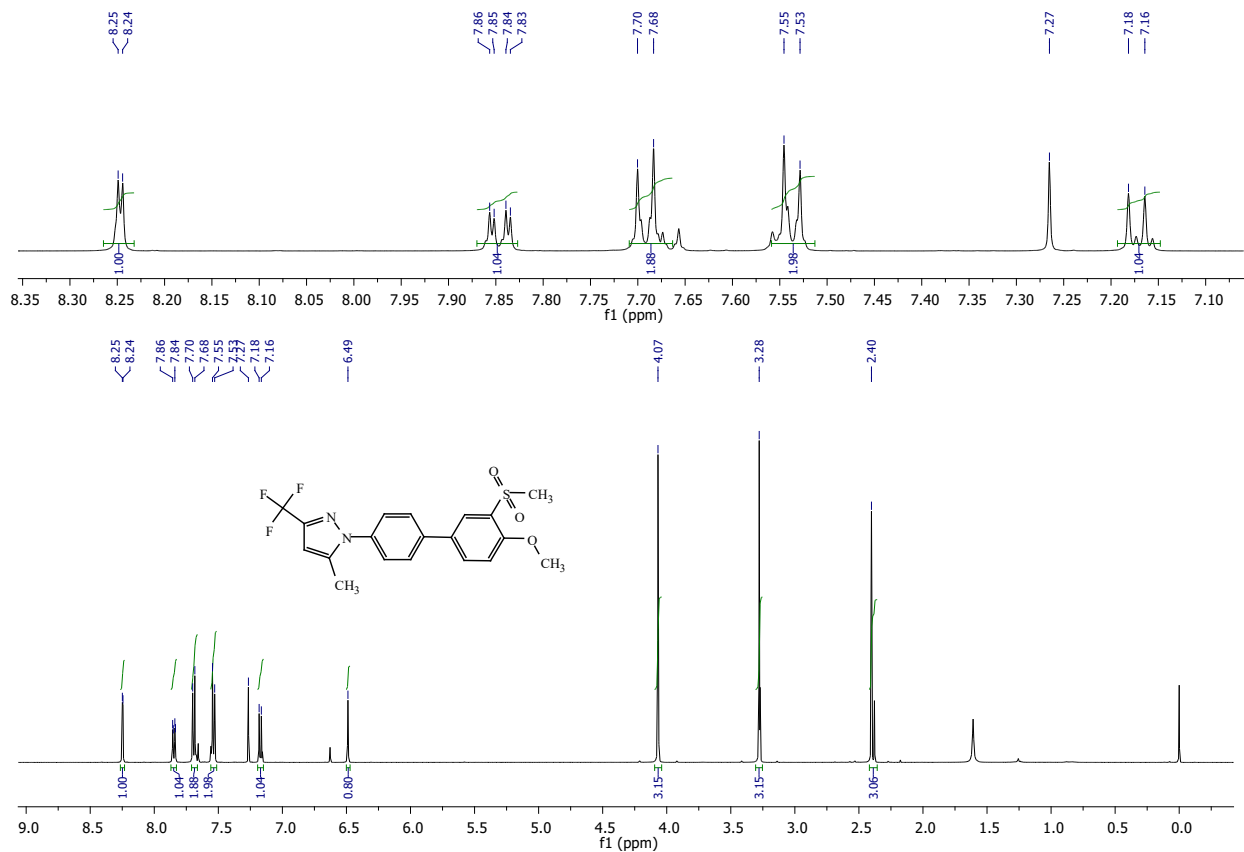

<sup>1</sup>H NMR spectrum (500 MHz, CDCl<sub>3</sub>) of 1-(4'-methoxy-3'-(methylsulfonyl)-[1,1'-biphenyl]-4-yl)-5-methyl-3-(trifluoromethyl)-1*H*-pyrazole (**5a**)

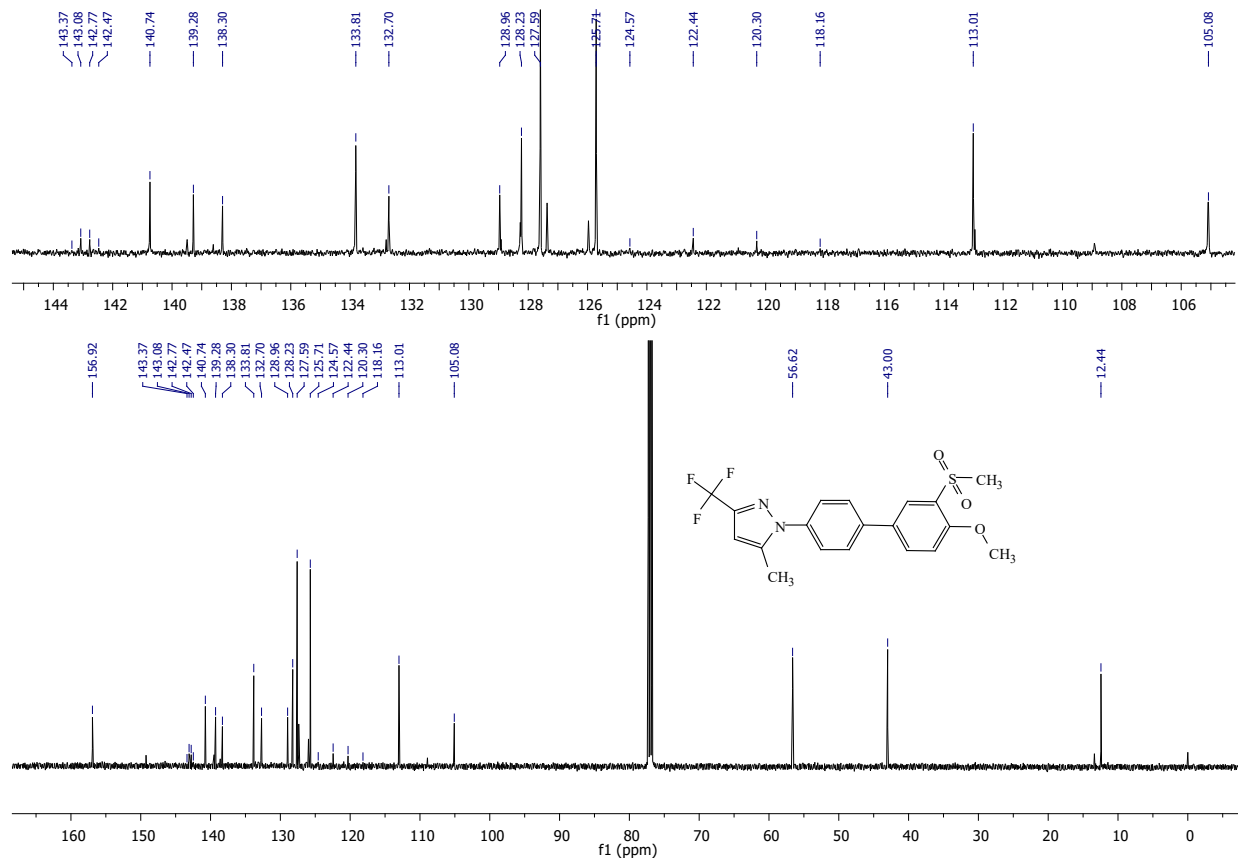

$^{13}\text{C}$  NMR spectrum (126 MHz,  $\text{CDCl}_3$ ) of 1-(4'-methoxy-3'-(methylsulfonyl)-[1,1'-biphenyl]-4-yl)-5-methyl-3-(trifluoromethyl)-1H-pyrazole (**5a**)

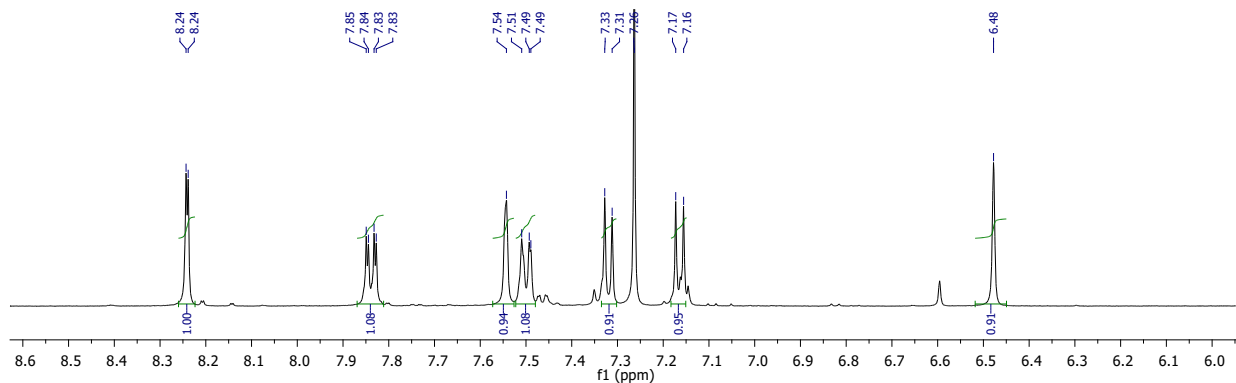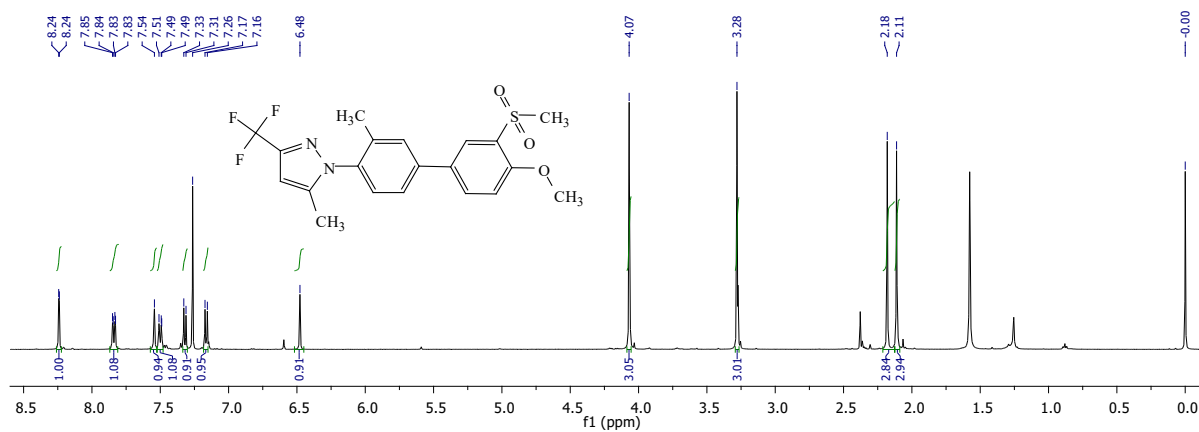

$^1\text{H}$  NMR spectrum (500 MHz,  $\text{CDCl}_3$ ) of 1-(4'-methoxy-3-methyl-3'-(methylsulfonyl)-[1,1'-biphenyl]-4-yl)-5-methyl-3-(trifluoromethyl)-1H-pyrazole (**5b**)

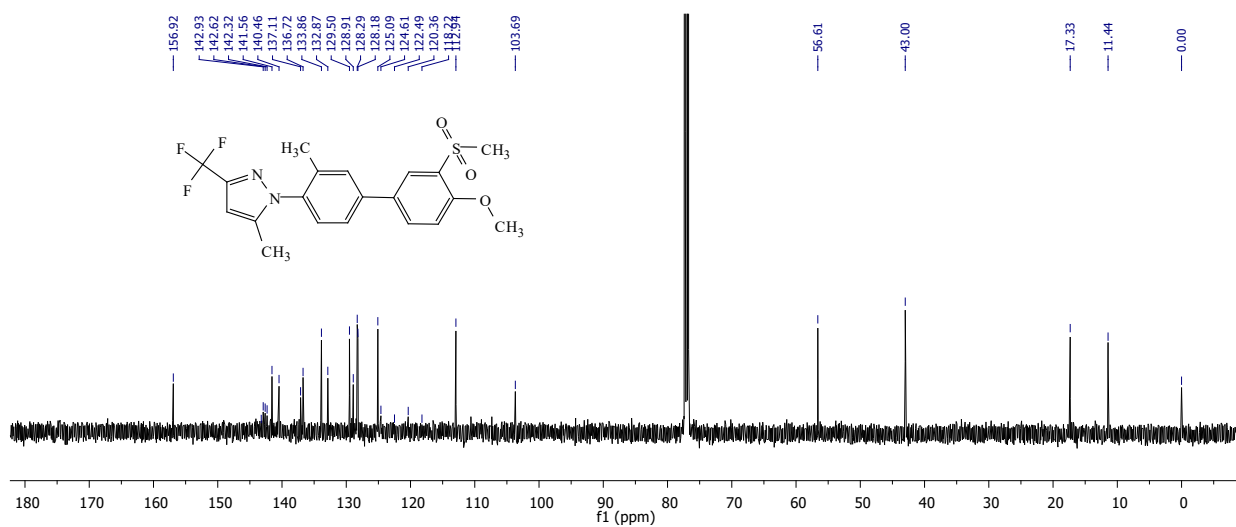

$^{13}\text{C}$  NMR spectrum (126 MHz,  $\text{CDCl}_3$ ) of 1-(4'-methoxy-3-methyl-3'-(methylsulfonyl)-[1,1'-biphenyl]-4-yl)-5-methyl-3-(trifluoromethyl)-1H-pyrazole (**5b**)

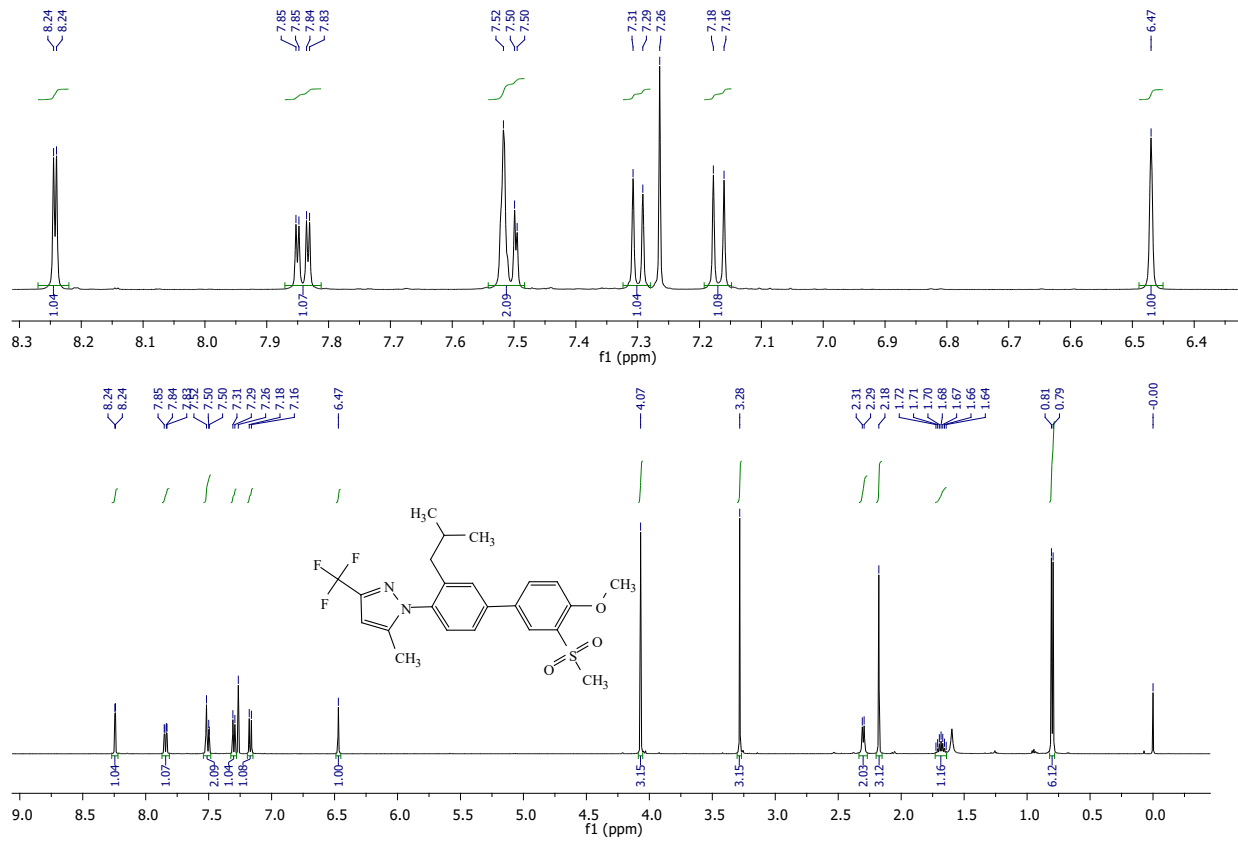

<sup>1</sup>H NMR spectrum (500 MHz, CDCl<sub>3</sub>) of 1-(3-isobutyl-4'-methoxy-3'-(methylsulfonyl)-[1,1'-biphenyl]-4-yl)-5-methyl-3-(trifluoromethyl)-1*H*-pyrazole (**5c**)



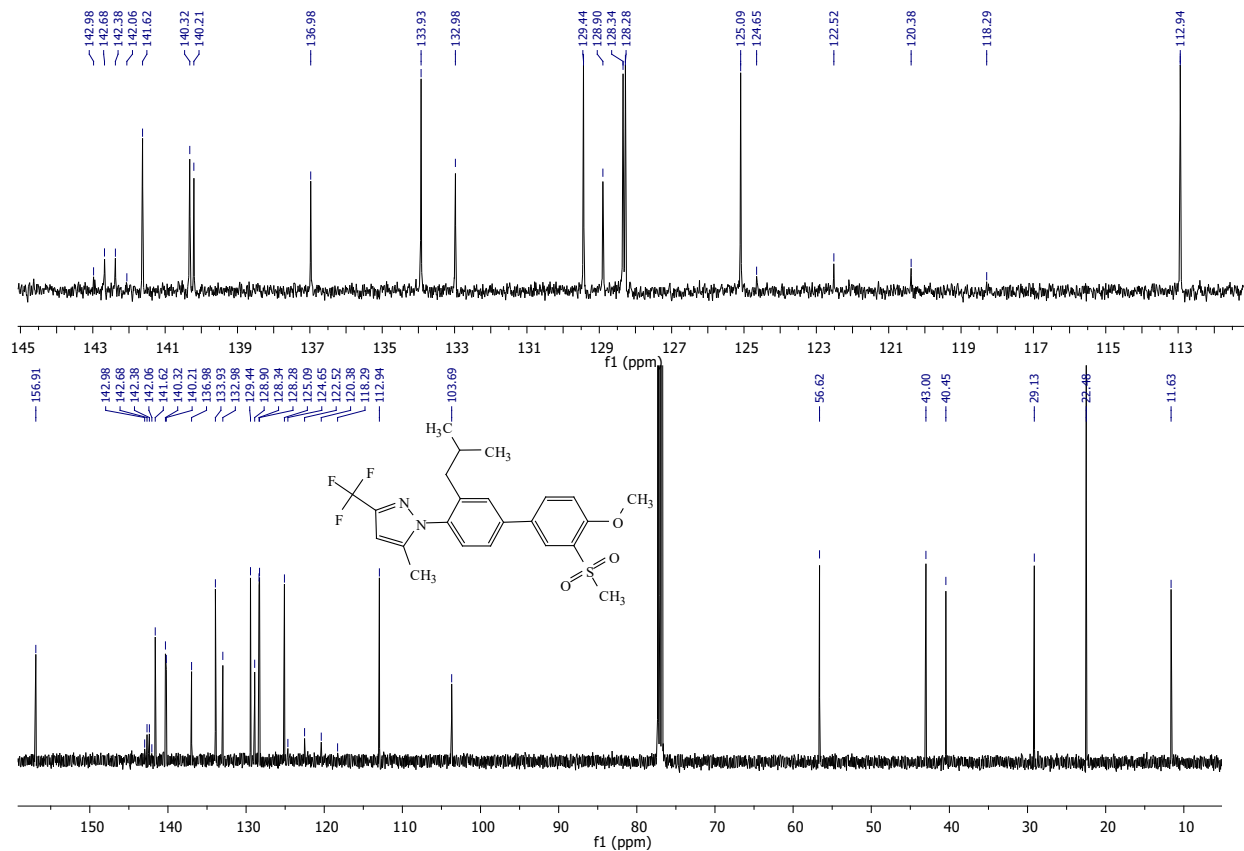

<sup>13</sup>C NMR spectrum (126 MHz, CDCl<sub>3</sub>) of 1-(3-isobutyl-4'-methoxy-3'-(methylsulfonyl)-[1,1'-biphenyl]-4-yl)-5-methyl-3-(trifluoromethyl)-1*H*-pyrazole (**5c**)

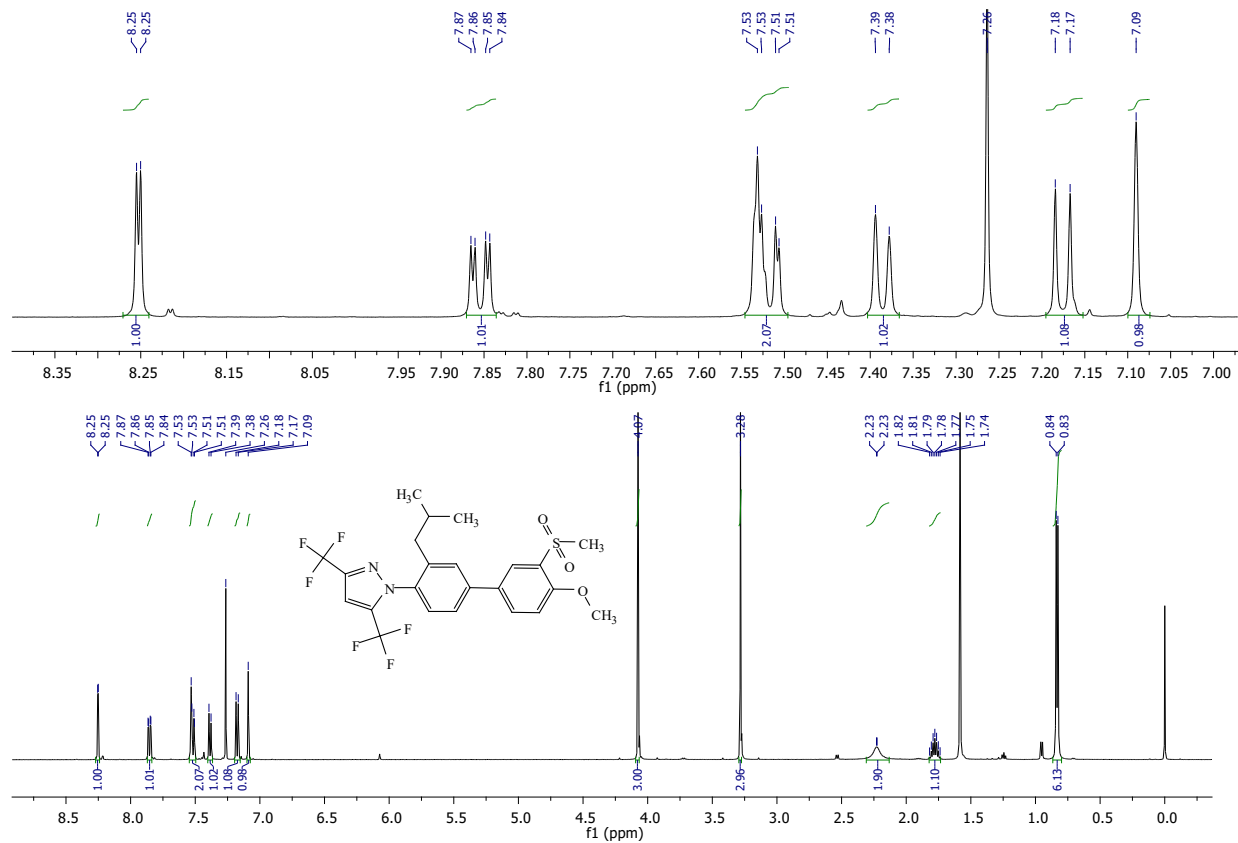

<sup>1</sup>H NMR spectrum (500 MHz, CDCl<sub>3</sub>) of 1-(3-isobutyl-4'-methoxy-3'-(methylsulfonyl)-[1,1'-biphenyl]-4-yl)-3,5-bis(trifluoromethyl)-1*H*-pyrazole (**5d**)

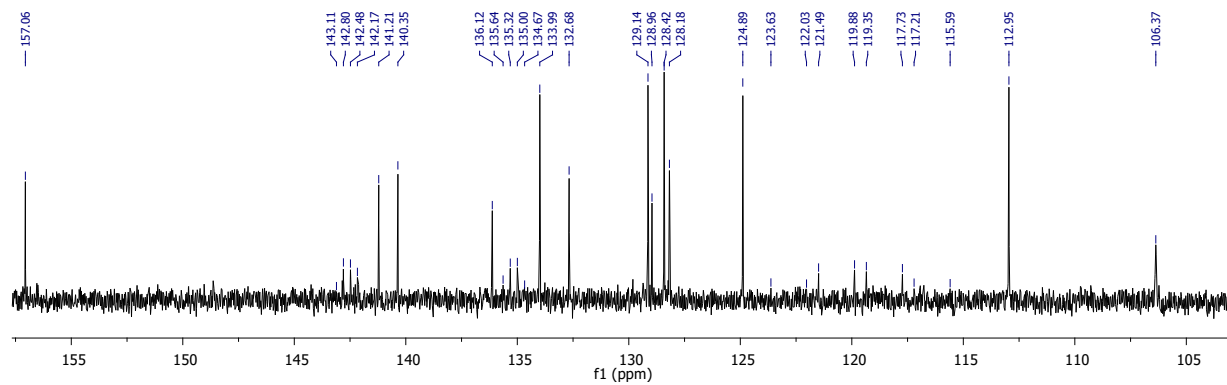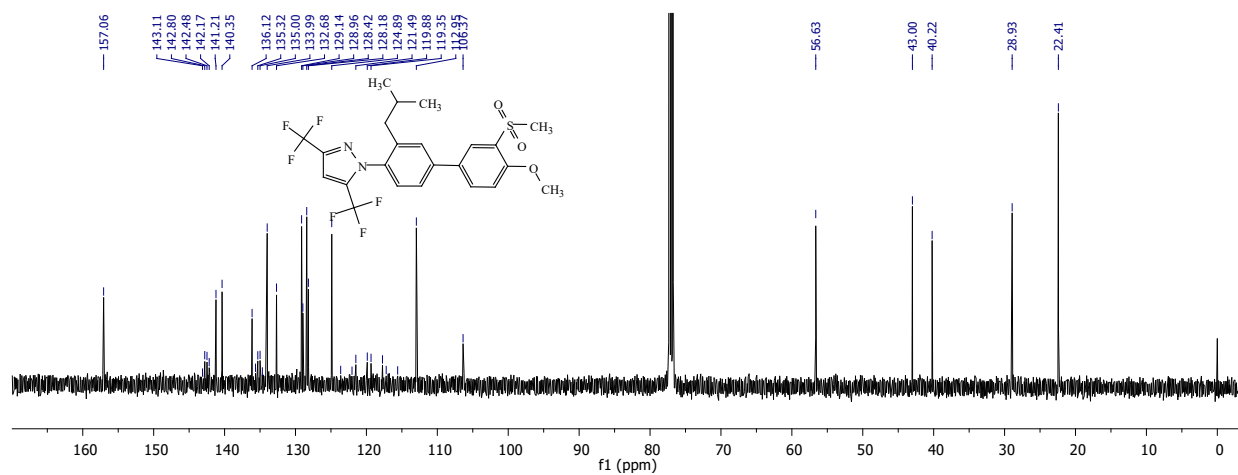

<sup>13</sup>C NMR spectrum (126 MHz, CDCl<sub>3</sub>) of 1-(3-isobutyl-4'-methoxy-3'-(methylsulfonyl)-[1,1'-biphenyl]-4-yl)-3,5-bis(trifluoromethyl)-1*H*-pyrazole (**5d**)

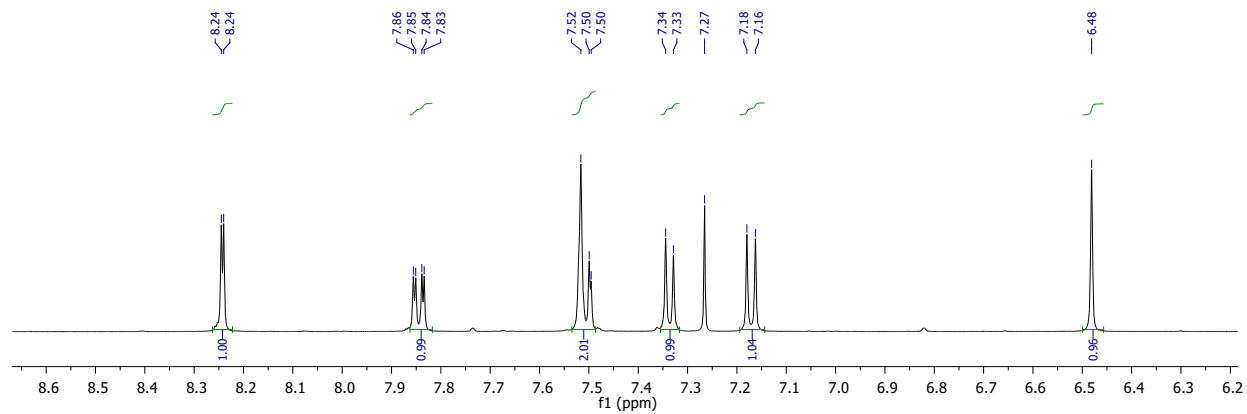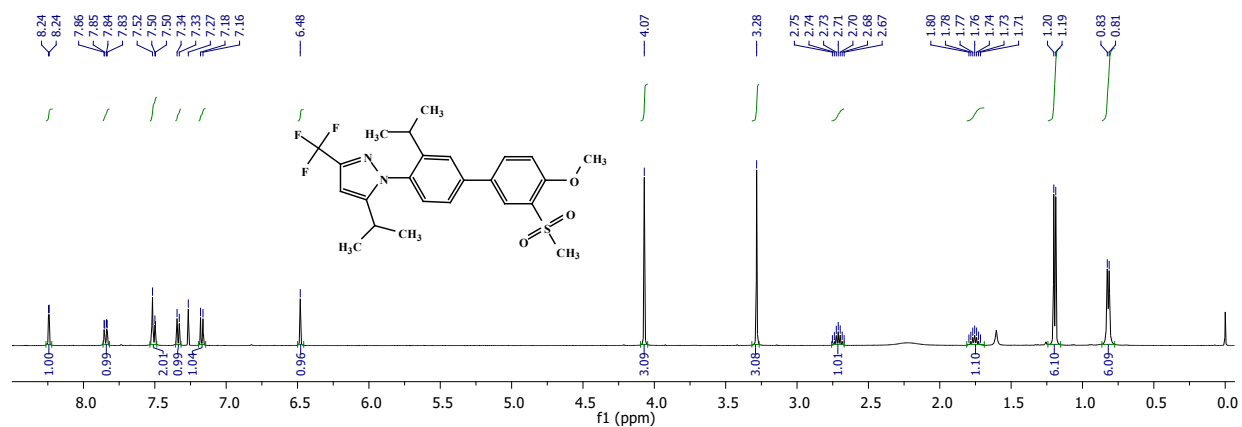

$^1\text{H}$  NMR spectrum (500 MHz,  $\text{CDCl}_3$ ) of 1-(3-isobutyl-4'-methoxy-3'-(methylsulfonyl)-[1,1'-biphenyl]-4-yl)-5-isopropyl-3-(trifluoromethyl)-1*H*-pyrazole (**5e**)

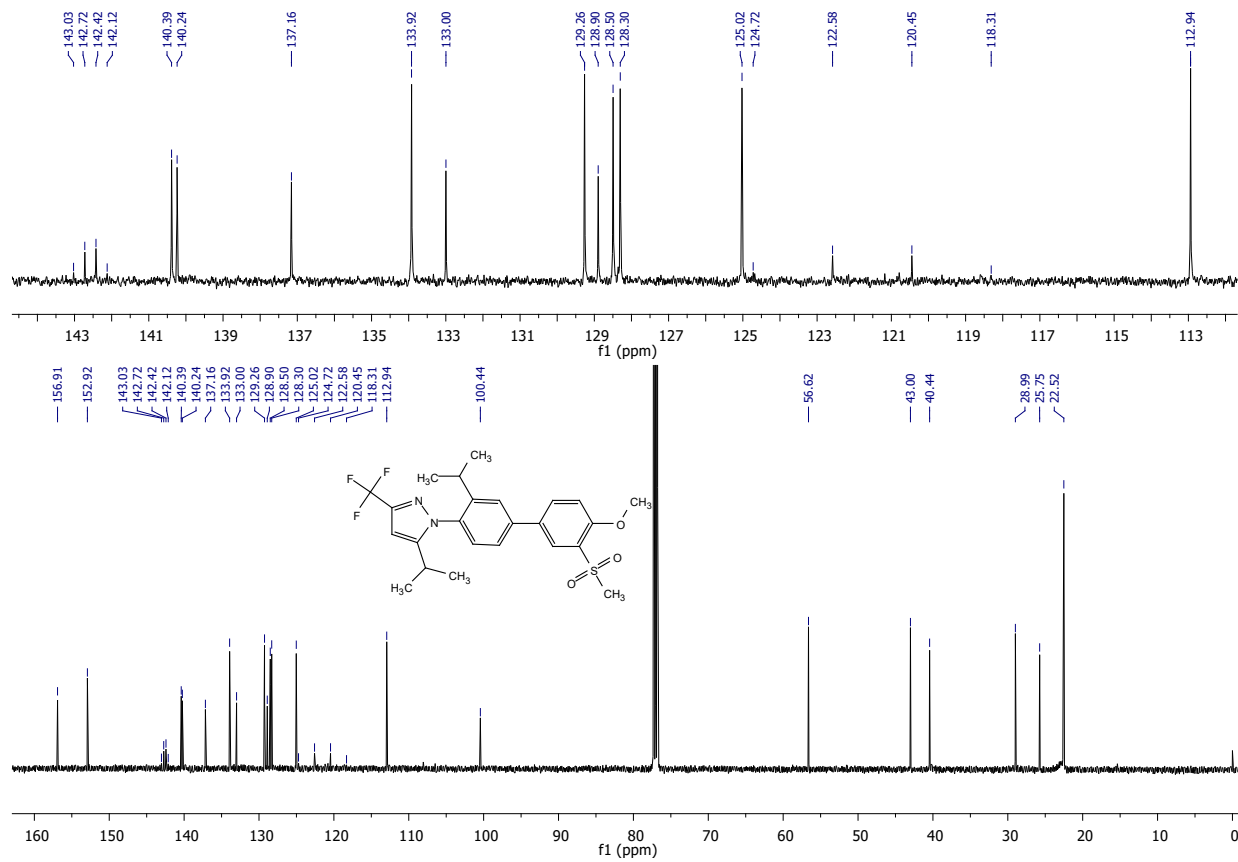

<sup>13</sup>C NMR spectrum (126 MHz, CDCl<sub>3</sub>) of 1-(3-isobutyl-4'-methoxy-3'-(methylsulfonyl)-[1,1'-biphenyl]-4-yl)-5-isopropyl-3-(trifluoromethyl)-1*H*-pyrazole (**5e**)

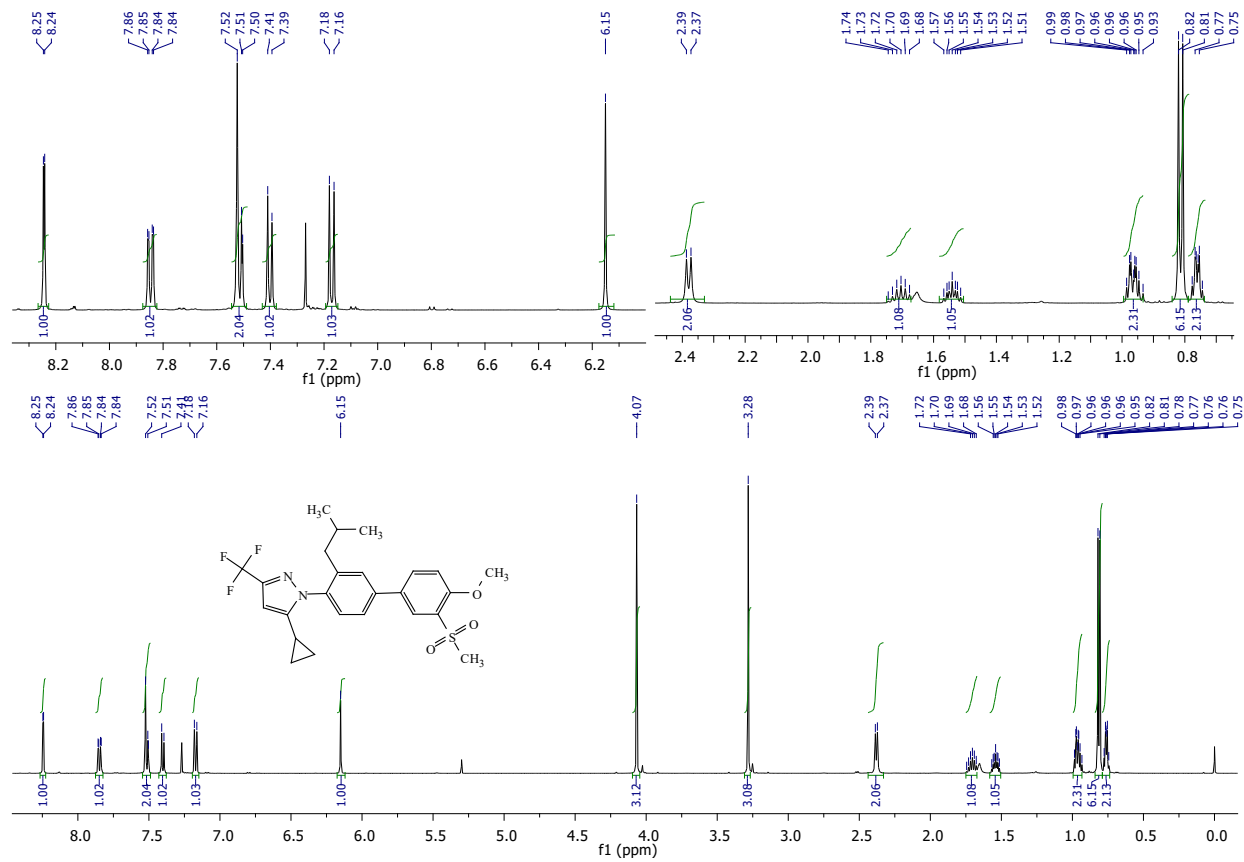

<sup>1</sup>H NMR spectrum (500 MHz, CDCl<sub>3</sub>) of 5-cyclopropyl-1-(3-isobutyl-4'-methoxy-3'-(methylsulfonyl)-[1,1'-biphenyl]-4-yl)-3-(trifluoromethyl)-1*H*-pyrazole (**5f**)

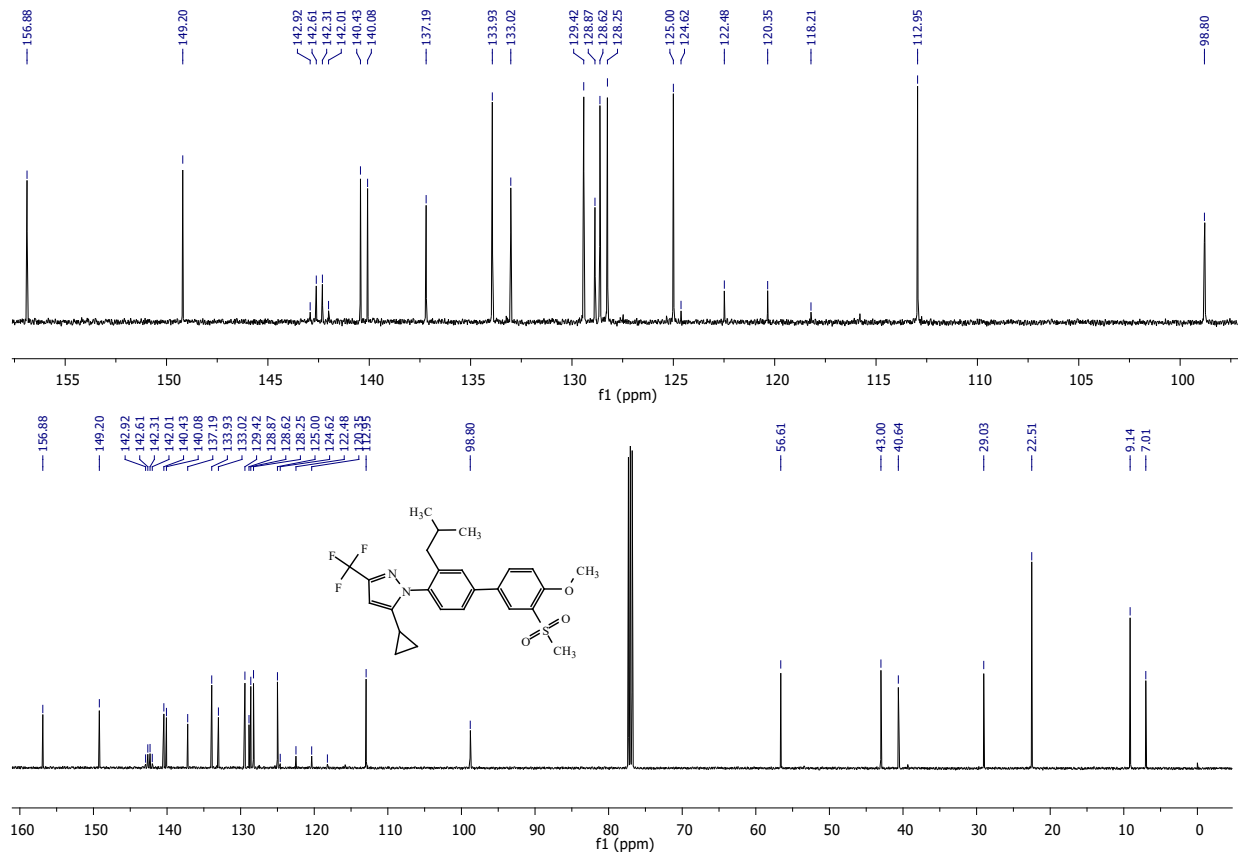

<sup>13</sup>C NMR spectrum (126 MHz, CDCl<sub>3</sub>) of 5-cyclopropyl-1-(3-isobutyl-4'-methoxy-3'-(methylsulfonyl)-[1,1'-biphenyl]-4-yl)-3-(trifluoromethyl)-1*H*-pyrazole (**5f**)

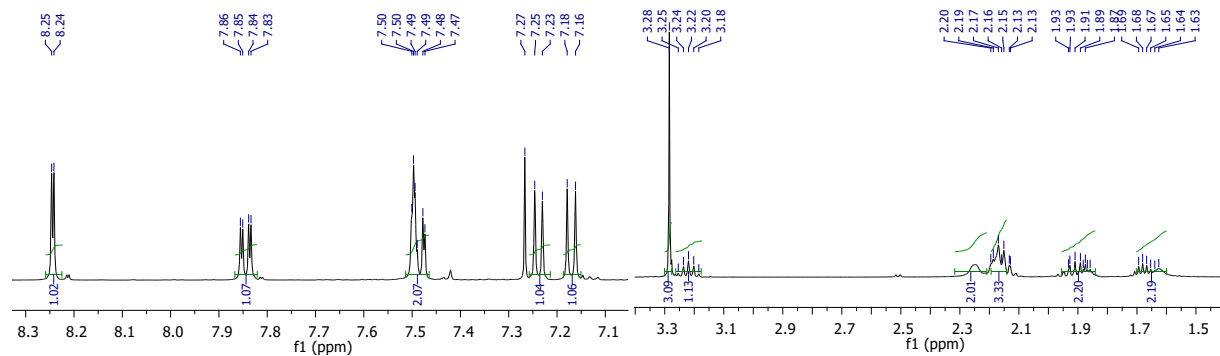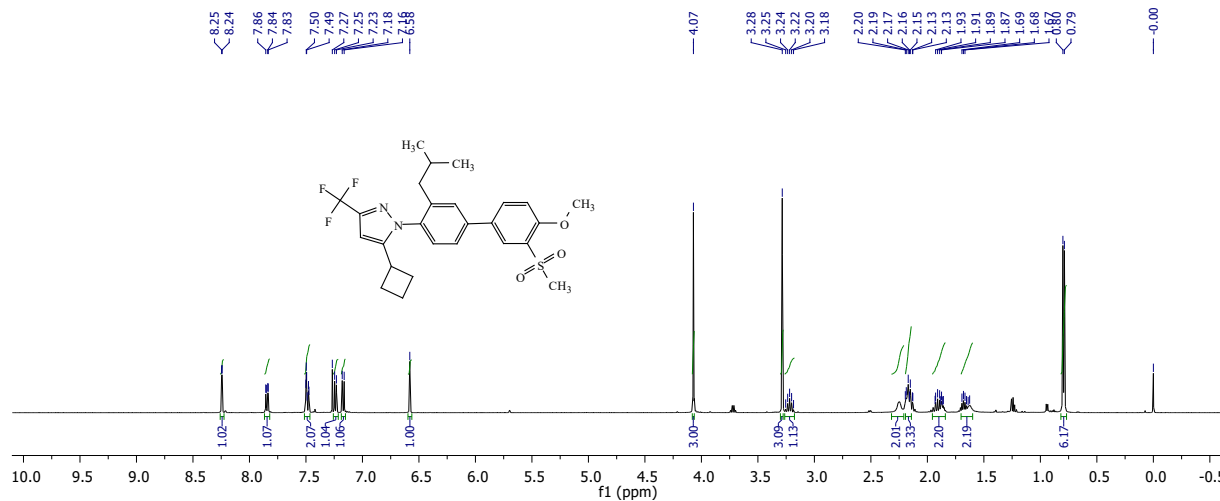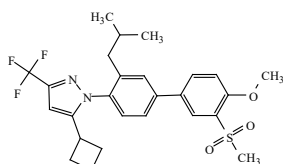

$^1\text{H}$  NMR spectrum (500 MHz,  $\text{CDCl}_3$ ) of 5-cyclobutyl-1-(3-isobutyl-4'-methoxy-3'-(methylsulfonyl)-[1,1'-biphenyl]-4-yl)-3-(trifluoromethyl)-1*H*-pyrazole (**5g**)





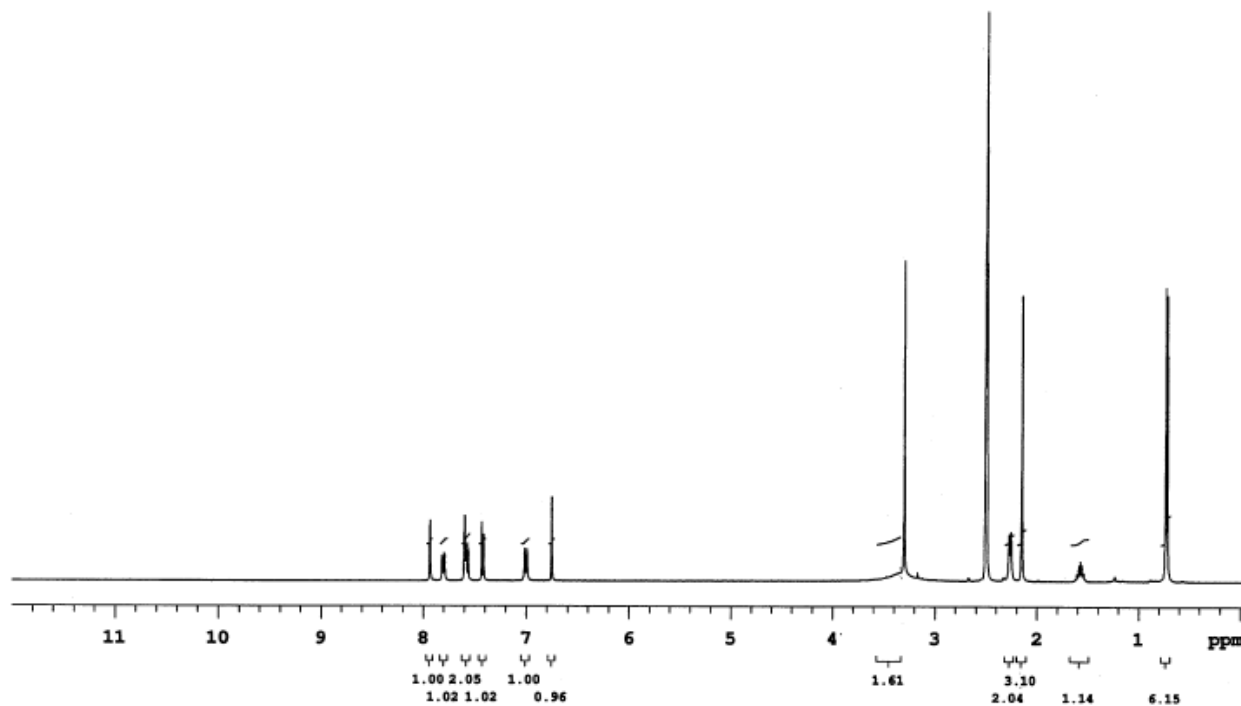

$^1\text{H}$  NMR spectrum (400 MHz,  $\text{DMSO-}d_6$ ) of 3'-isobutyl-4'-(5-methyl-3-(trifluoromethyl)-1*H*-pyrazol-1-yl)-3-(methylsulfonyl)-[1,1'-biphenyl]-4-ol (**6a**)

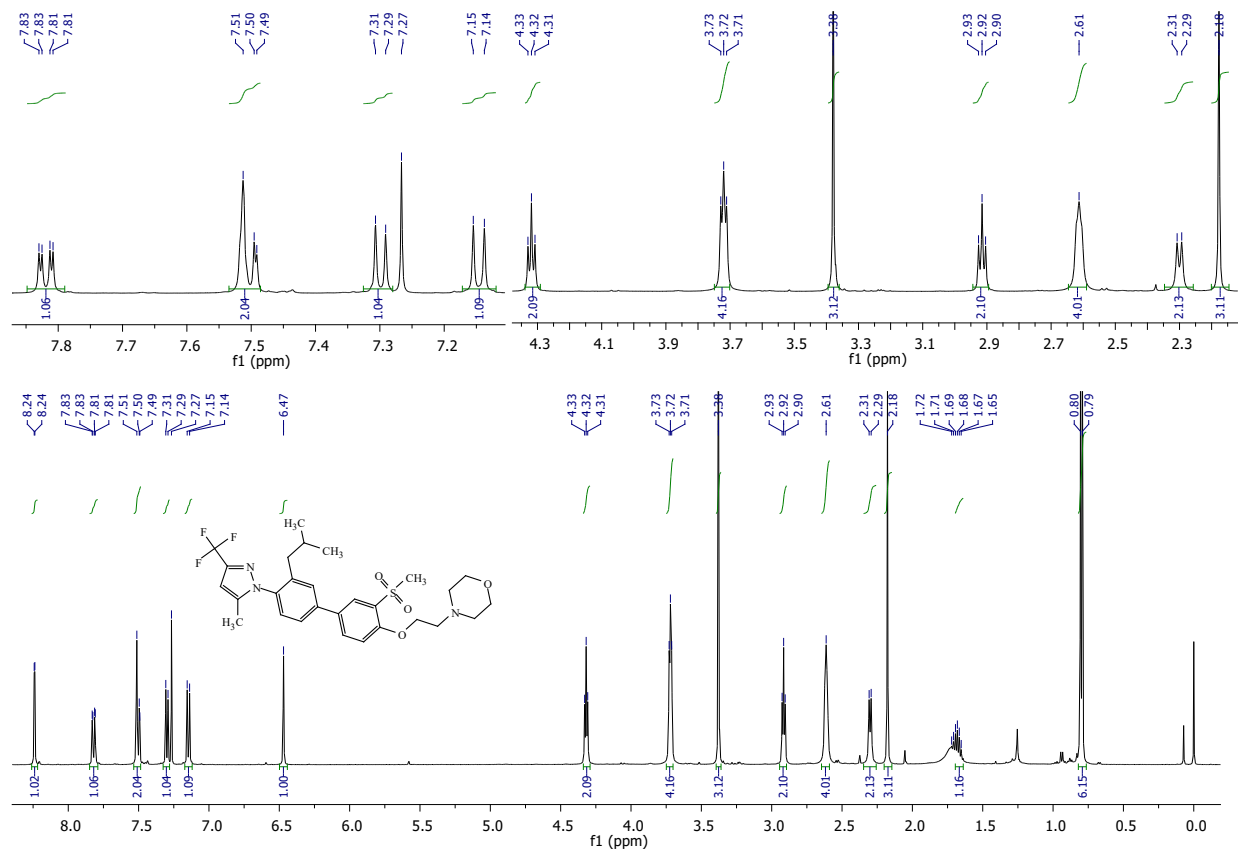

<sup>1</sup>H NMR spectrum (500 MHz, CDCl<sub>3</sub>) of 4-(2-((3'-isobutyl-4'-(5-methyl-3-(trifluoromethyl)-1H-pyrazol-1-yl)-3-(methylsulfonyl)-[1,1'-biphenyl]-4-yl)oxy)ethyl)morpholine (**6b**)

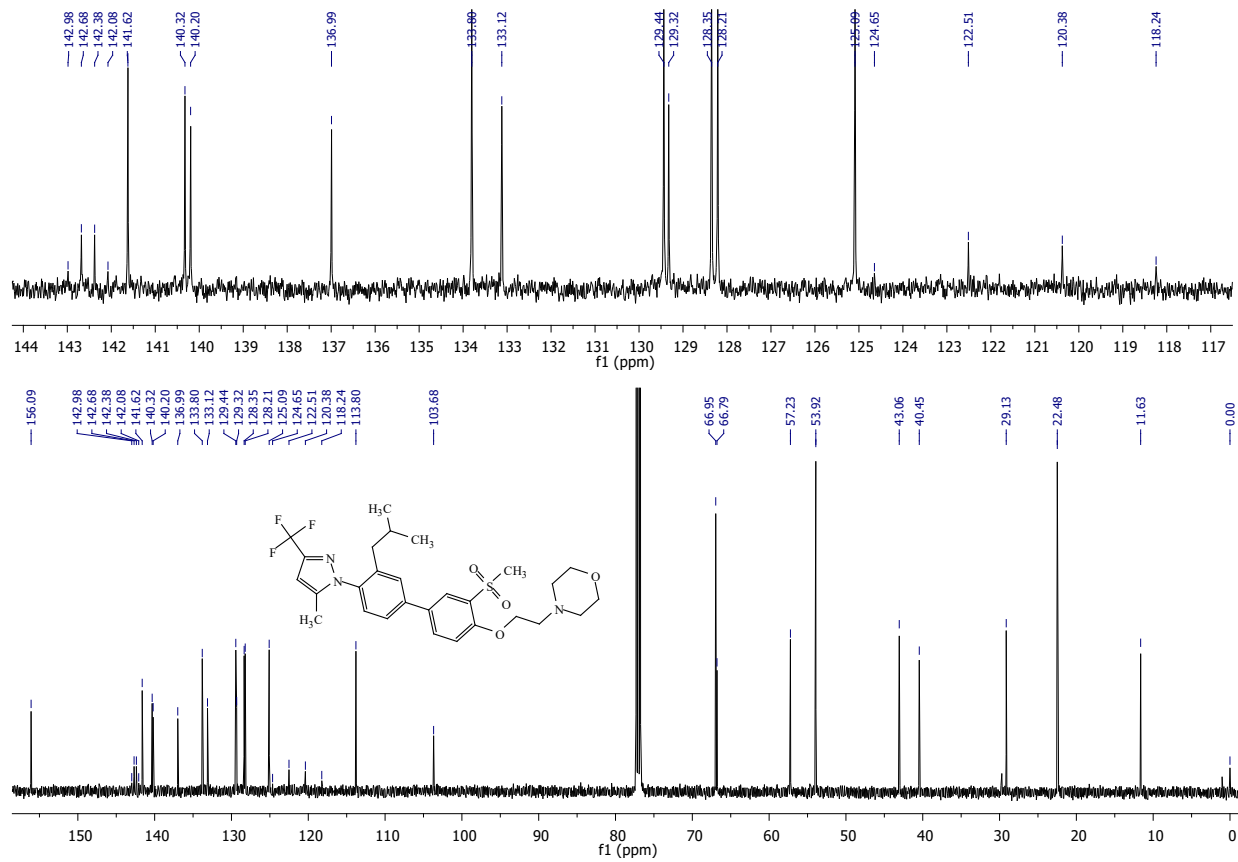

<sup>13</sup>C NMR spectrum (126 MHz, CDCl<sub>3</sub>) of 4-(2-((3'-isobutyl-4'-(5-methyl-3-(trifluoromethyl)-1H-pyrazol-1-yl)-3-(methylsulfonyl)-[1,1'-biphenyl]-4-yl)oxy)ethyl)morpholine (**6b**)

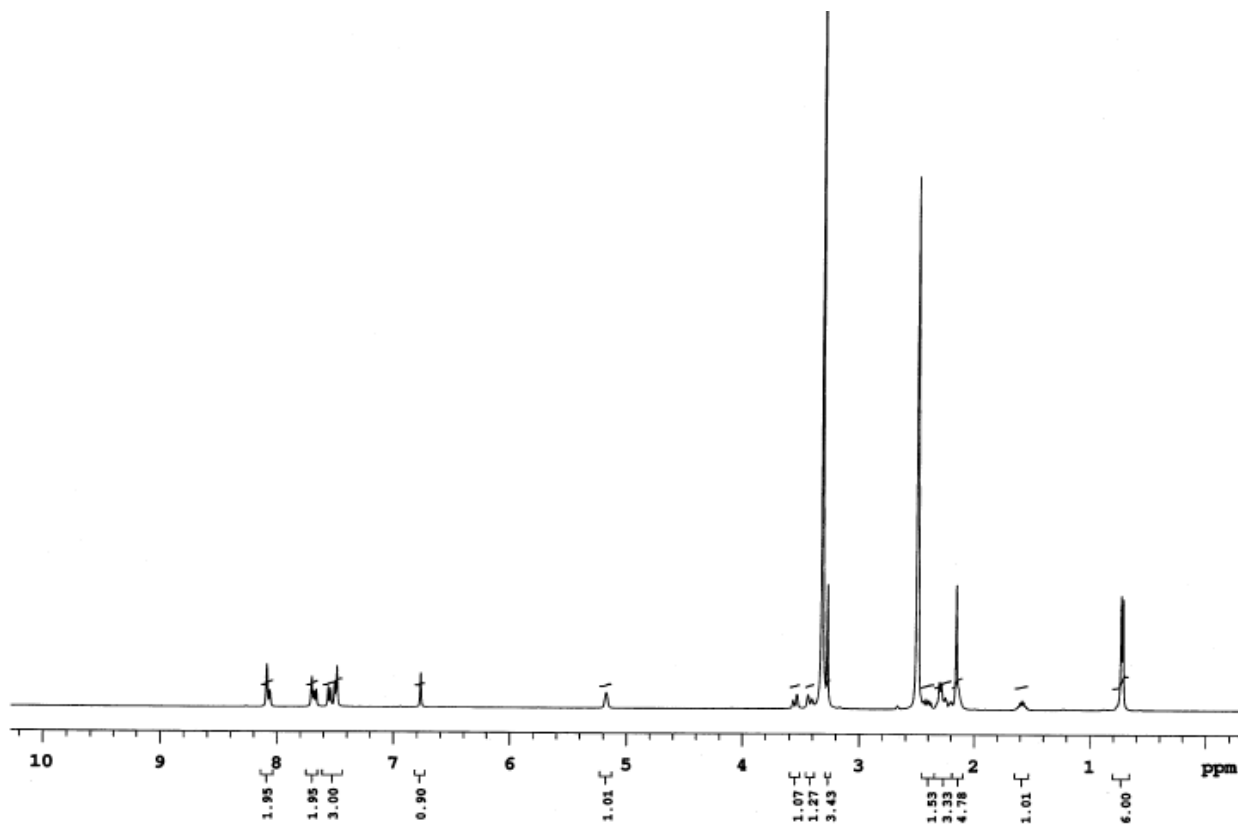

<sup>1</sup>H NMR spectrum (400 MHz, DMSO-*d*<sub>6</sub>) of 5-((3'-isobutyl-4'-(5-methyl-3-(trifluoromethyl)-1*H*-pyrazol-1-yl)-3-(methylsulfonyl)-[1,1'-biphenyl]-4-yl)oxy)piperidin-2-one, (**6c**)

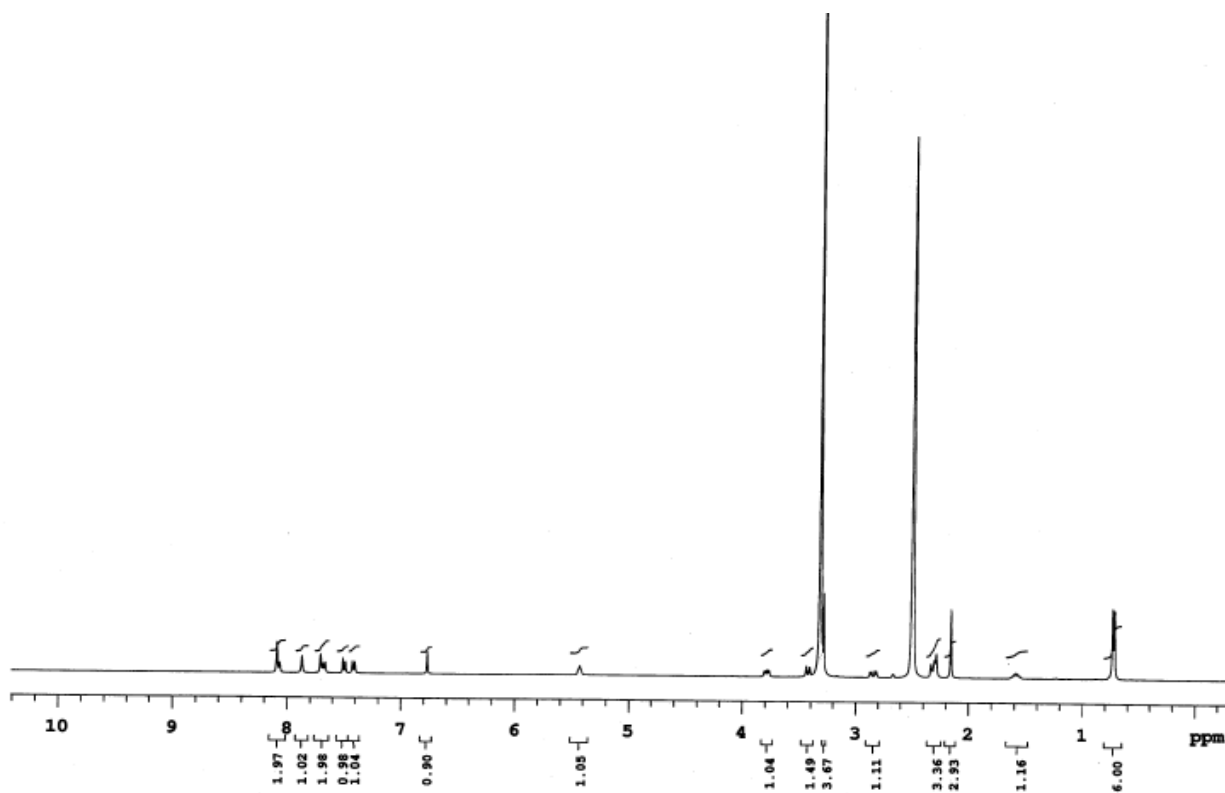

<sup>1</sup>H NMR spectrum (400 MHz, DMSO-*d*<sub>6</sub>) of 4-((3'-isobutyl-4'-(5-methyl-3-(trifluoromethyl)-1*H*-pyrazol-1-yl)-3-(methylsulfonyl)-[1,1'-biphenyl]-4-yl)oxy)pyrrolidin-2-one (**6d**)

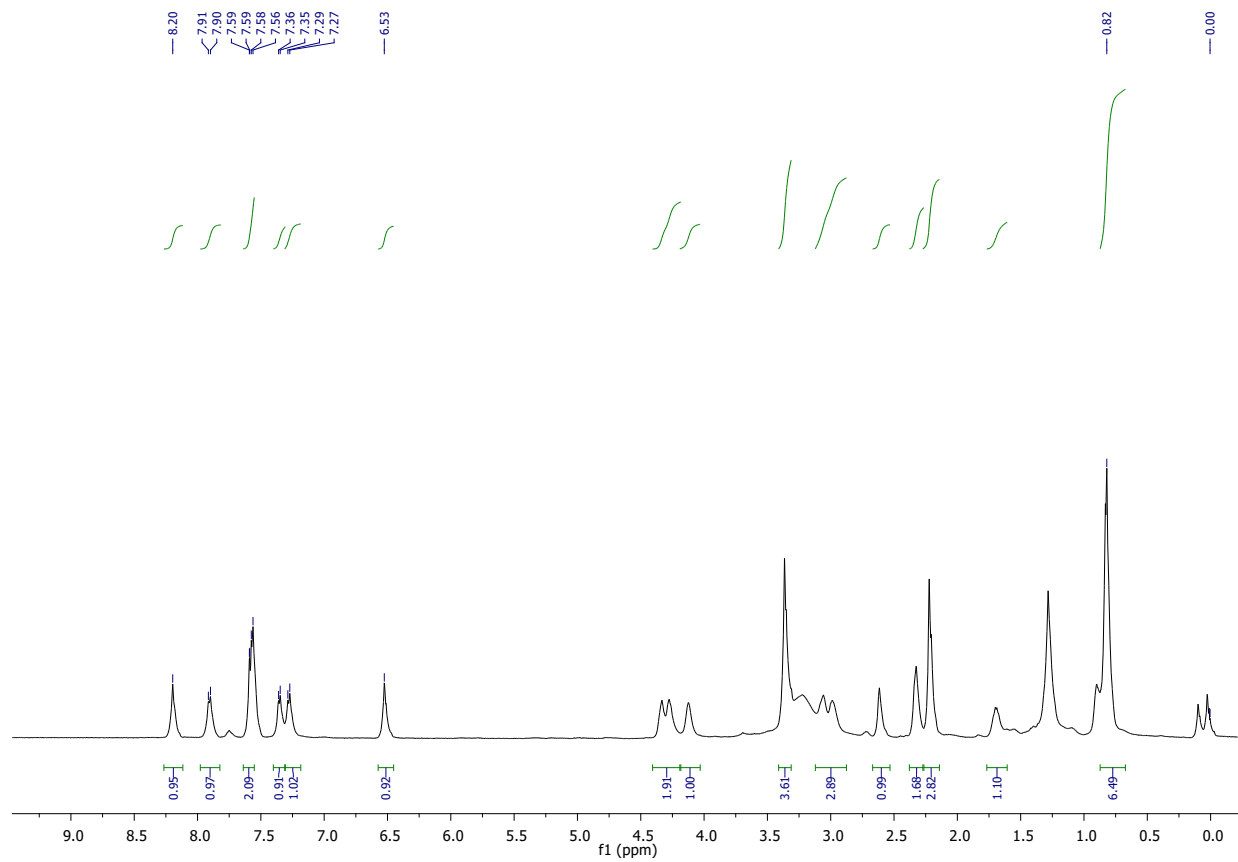

<sup>1</sup>H NMR spectrum (500 MHz, CDCl<sub>3</sub>) of 1-amino-3-((3'-isobutyl-4'-(5-methyl-3-(trifluoromethyl)-1*H*-pyrazol-1-yl)-3-(methylsulfonyl)-[1,1'-biphenyl]-4-yl)oxy)propan-2-ol (**6e**)

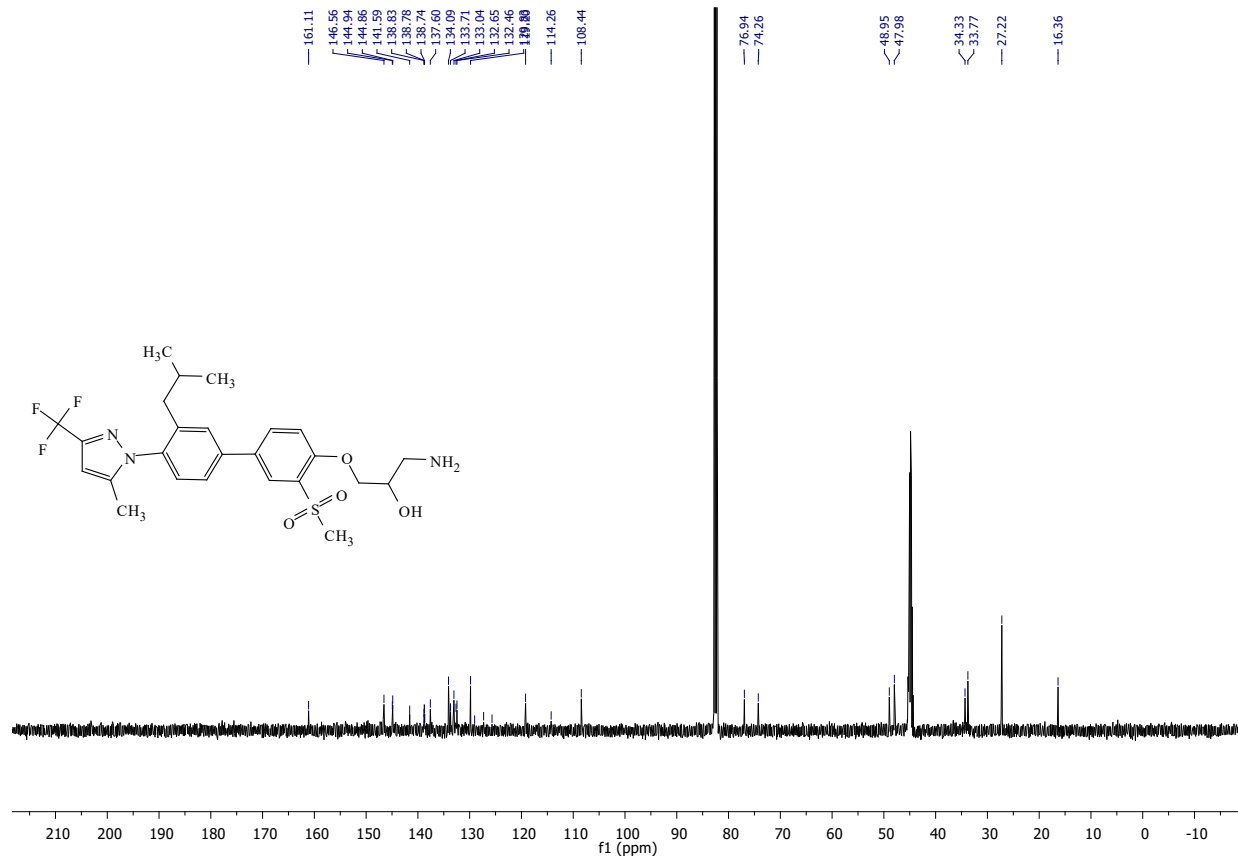

<sup>13</sup>C NMR spectrum (126 MHz, CDCl<sub>3</sub>) of 1-amino-3-((3'-isobutyl-4'-(5-methyl-3-(trifluoromethyl)-1H-pyrazol-1-yl)-3-(methylsulfonyl)-[1,1'-biphenyl]-4-yl)oxy)propan-2-ol (6e)



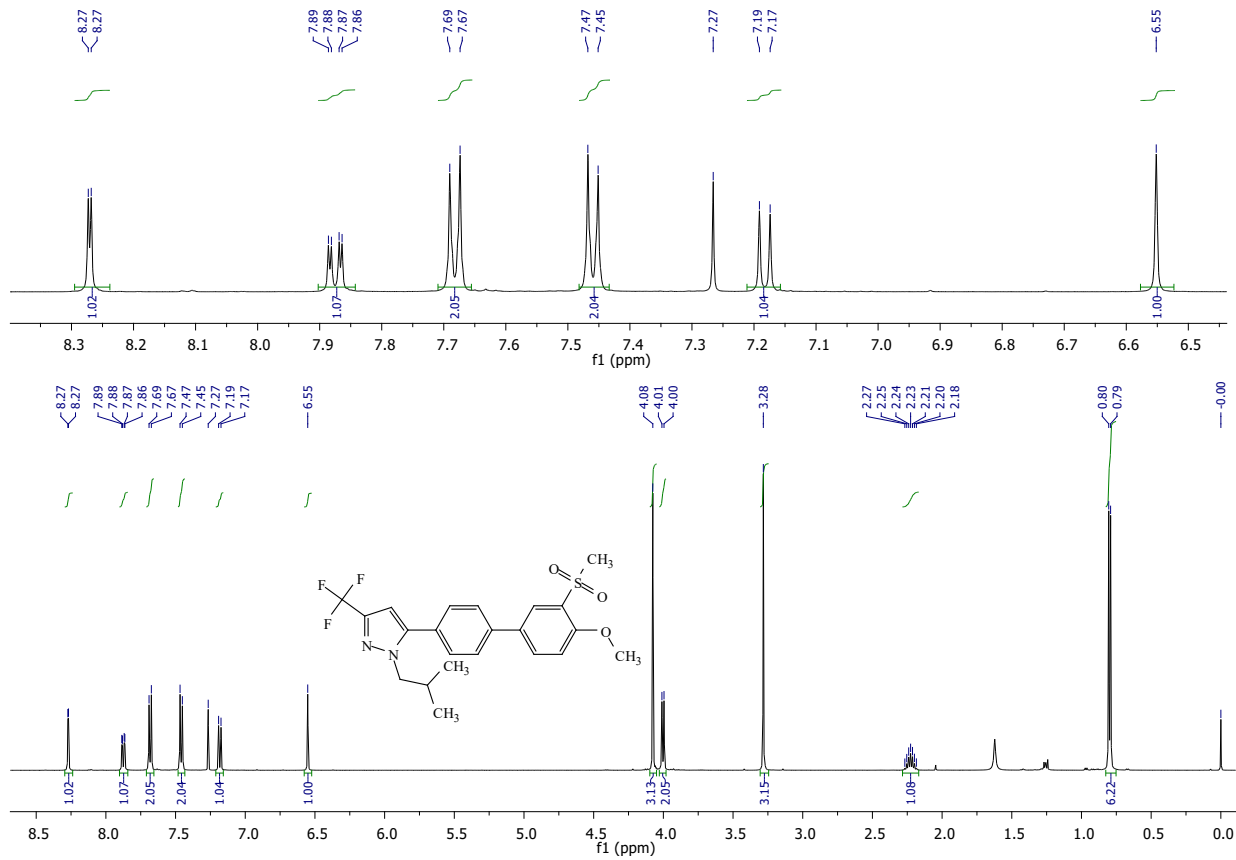

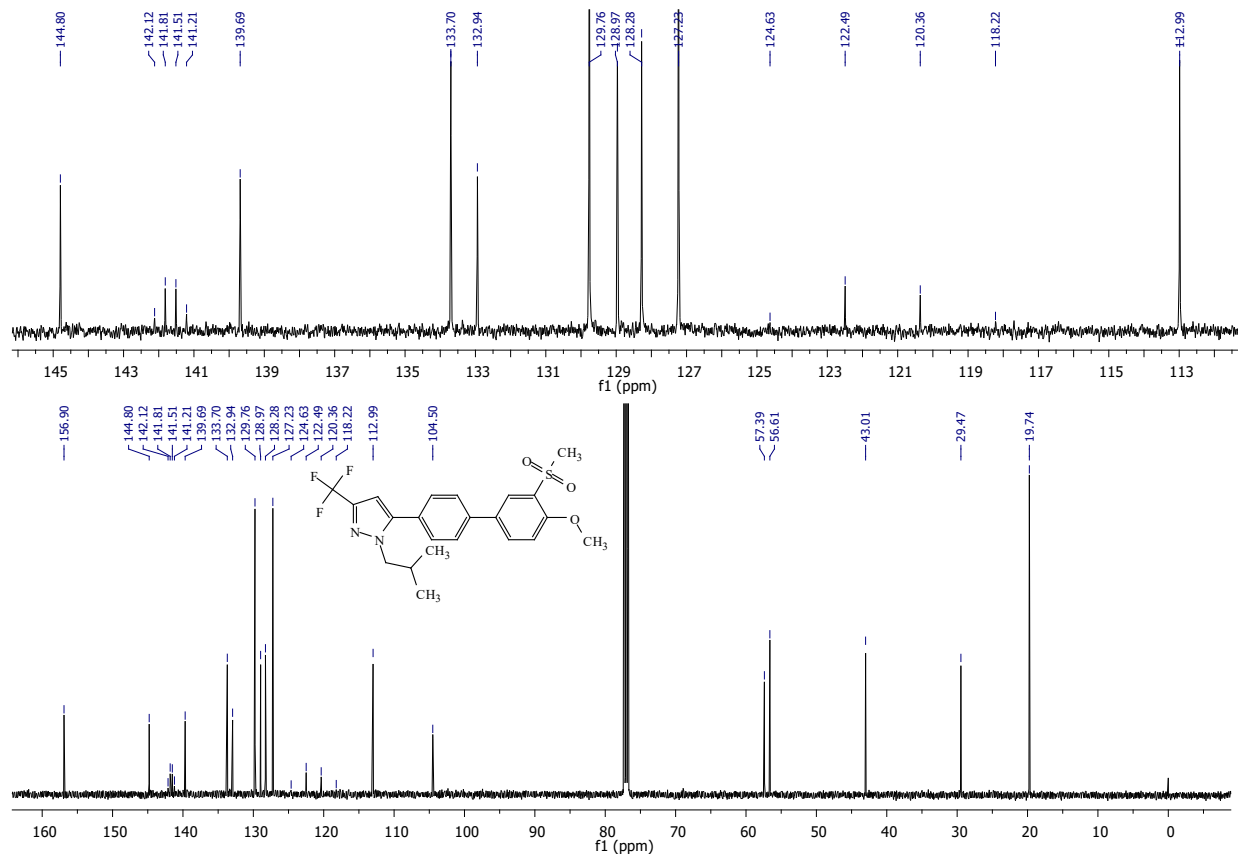

<sup>13</sup>C NMR spectrum (126 MHz, CDCl<sub>3</sub>) of 1-isobutyl-5-(4'-methoxy-3'-(methylsulfonyl)-[1,1'-biphenyl]-4-yl)-3-(trifluoromethyl)-1*H*-pyrazole (**9a**)

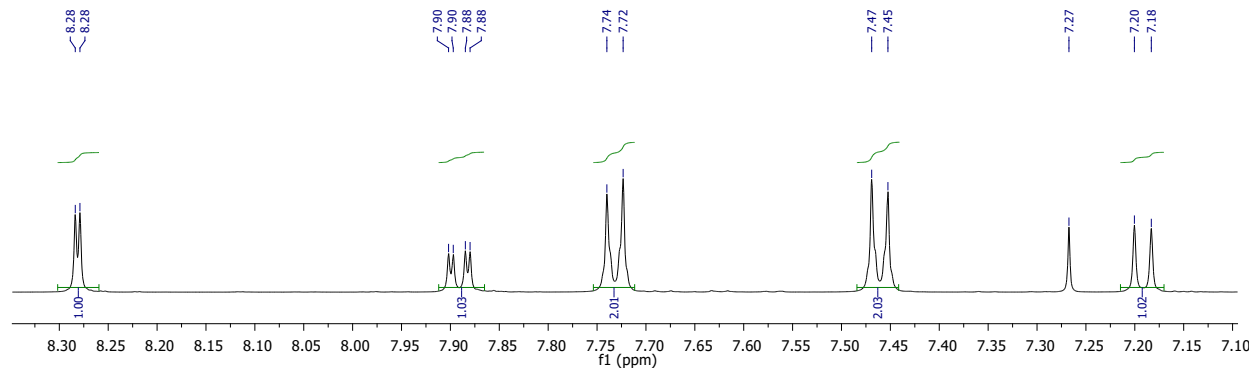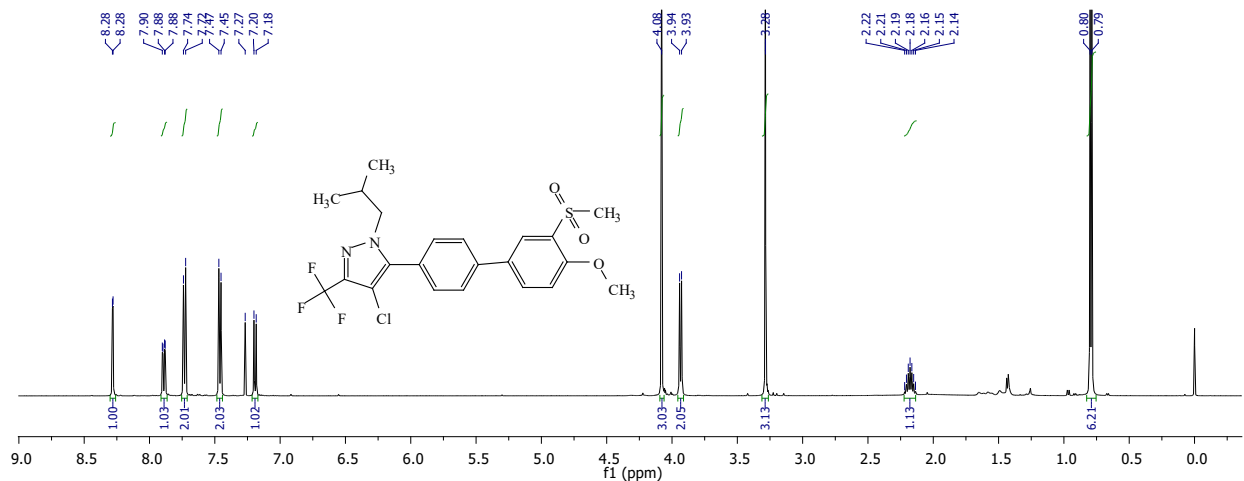

<sup>1</sup>H NMR spectrum (500 MHz, CDCl<sub>3</sub>) of 4-chloro-1-isobutyl-5-(4'-methoxy-3'-(methylsulfonyl)-[1,1'-biphenyl]-4-yl)-3-(trifluoromethyl)-1*H*-pyrazole (**9b**)

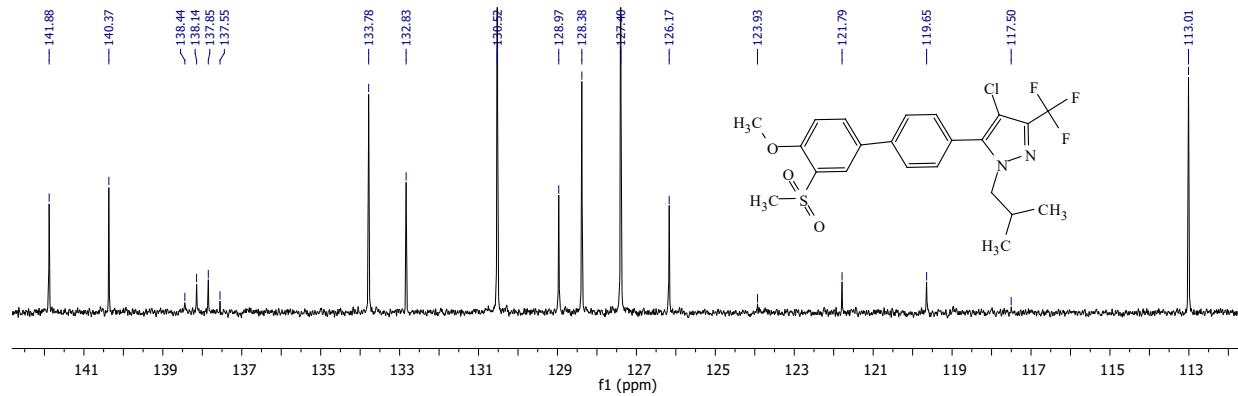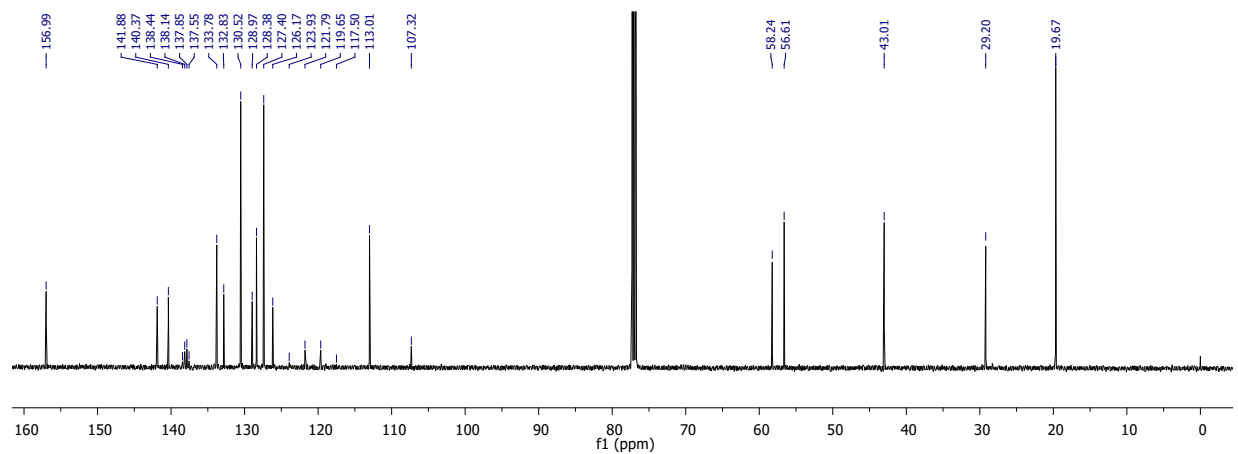

$^{13}\text{C}$  NMR spectrum (126 MHz,  $\text{CDCl}_3$ ) of 4-chloro-1-isobutyl-5-(4'-methoxy-3'-(methylsulfonyl)-[1,1'-biphenyl]-4-yl)-3-(trifluoromethyl)-1*H*-pyrazole (**9b**)

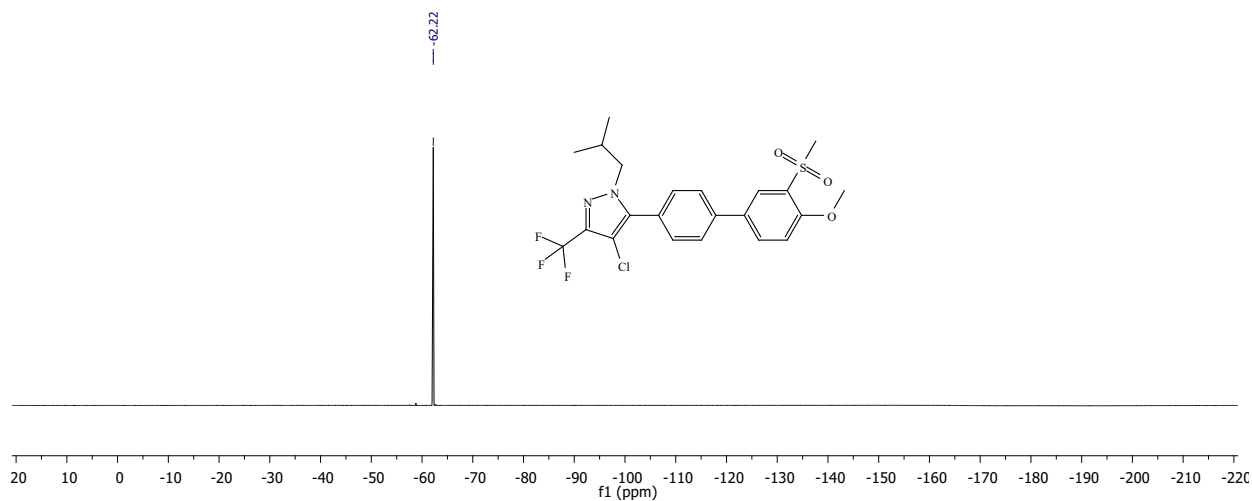

$^{19}\text{F}$  NMR spectrum (500 MHz,  $\text{CDCl}_3$ ) of 4-chloro-1-isobutyl-5-(4'-methoxy-3'-(methylsulfonyl)-[1,1'-biphenyl]-4-yl)-3-(trifluoromethyl)-1*H*-pyrazole (**9b**)

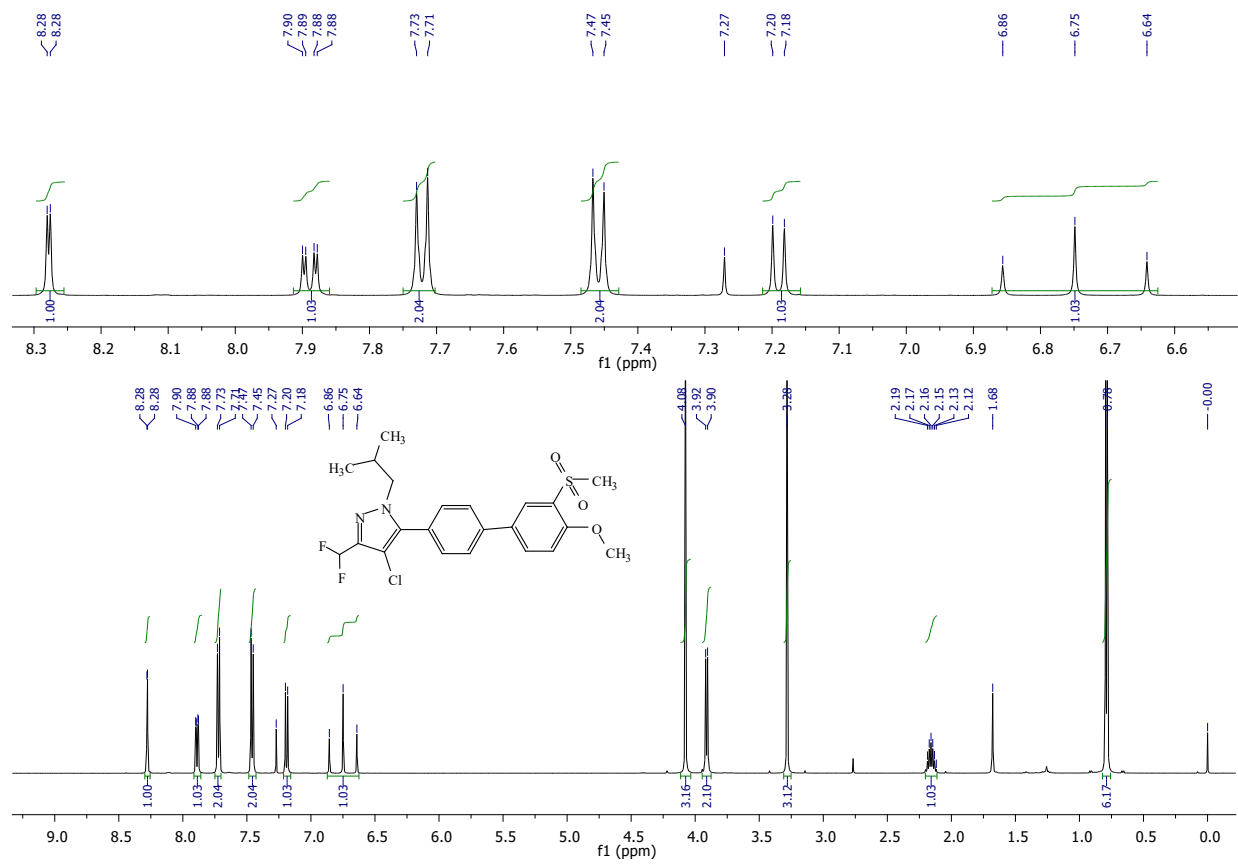

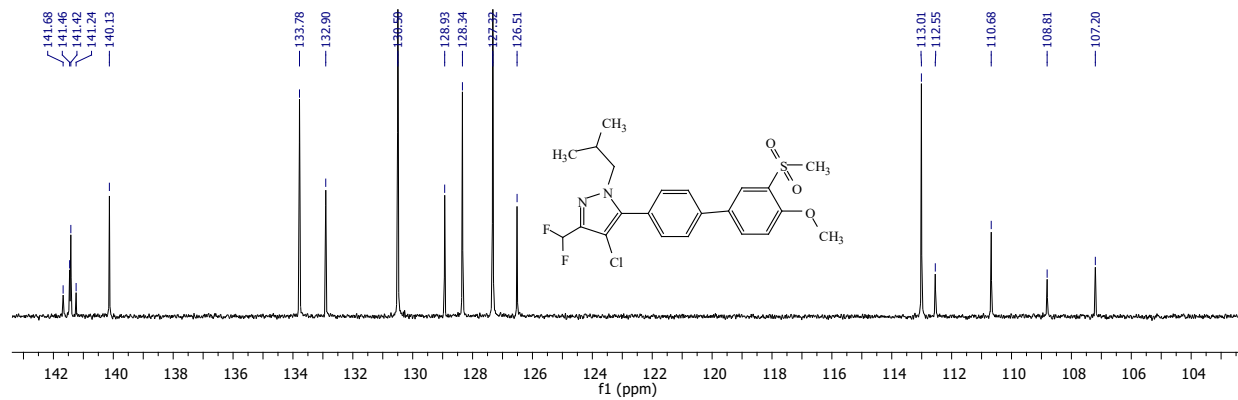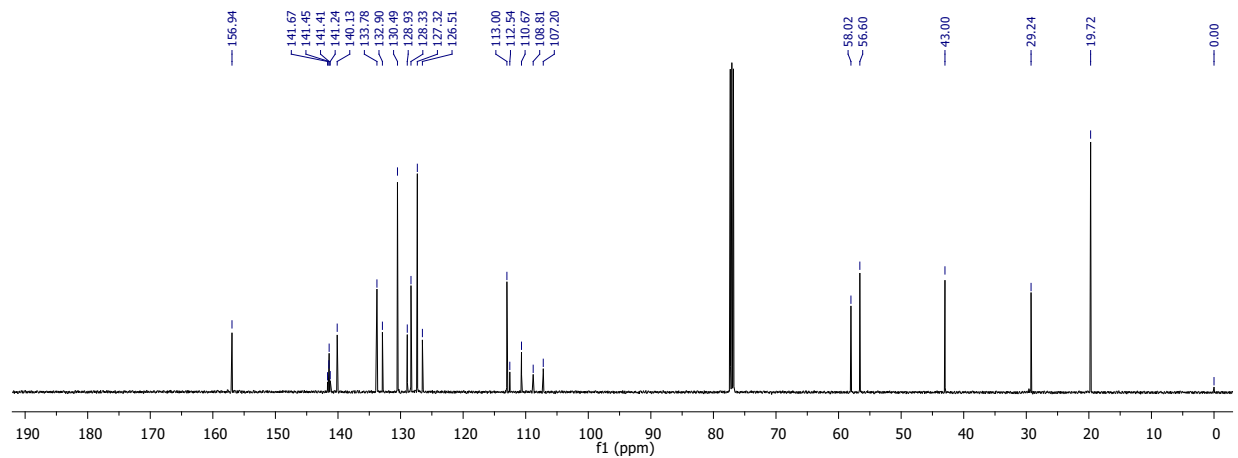

$^{13}\text{C}$  NMR spectrum (126 MHz,  $\text{CDCl}_3$ ) of 4-chloro-3-(difluoromethyl)-1-isobutyl-5-(4'-methoxy-3'-(methylsulfonyl)-[1,1'-biphenyl]-4-yl)-1H-pyrazole (**9c**)

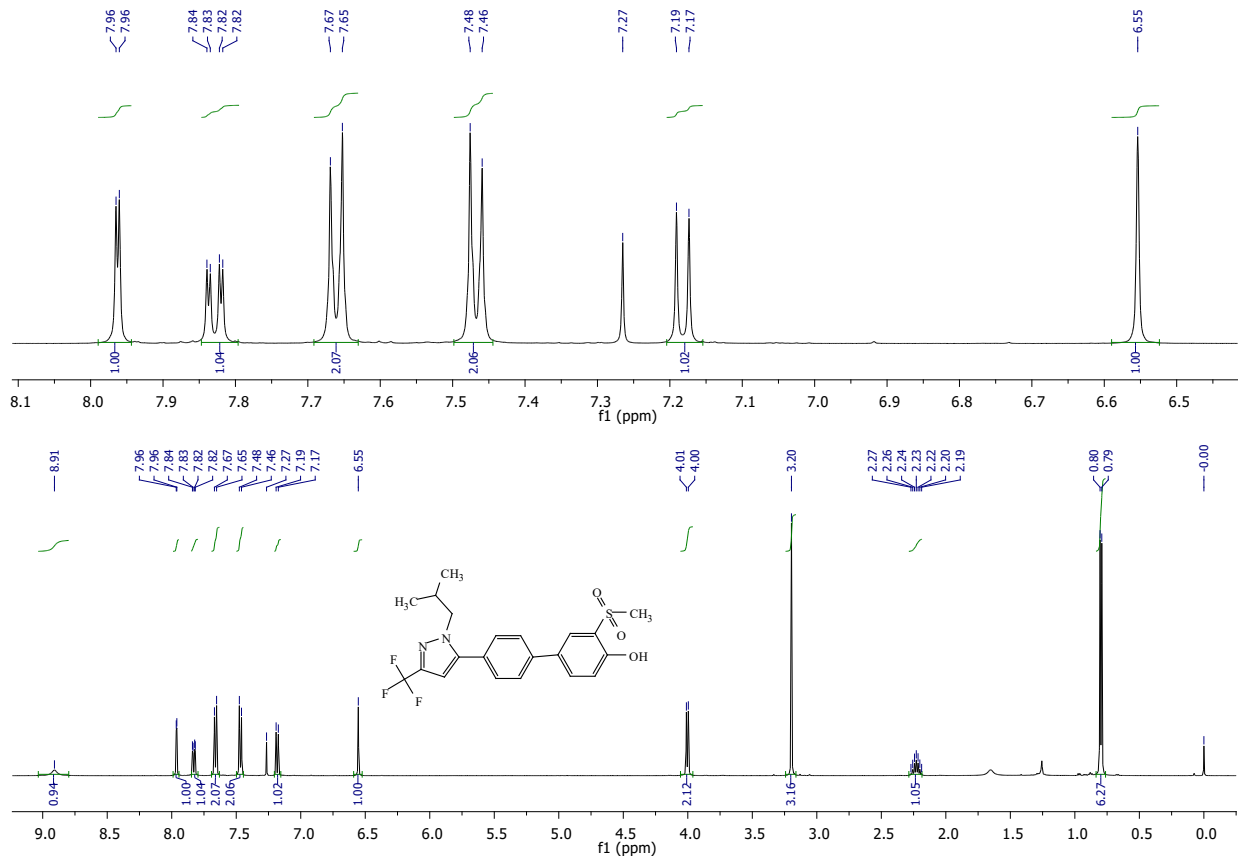

<sup>1</sup>H NMR spectrum (500 MHz, CDCl<sub>3</sub>) of 4'-(1-isobutyl-3-(trifluoromethyl)-1*H*-pyrazol-5-yl)-3-(methylsulfonyl)-[1,1'-biphenyl]-4-ol (**10a**)

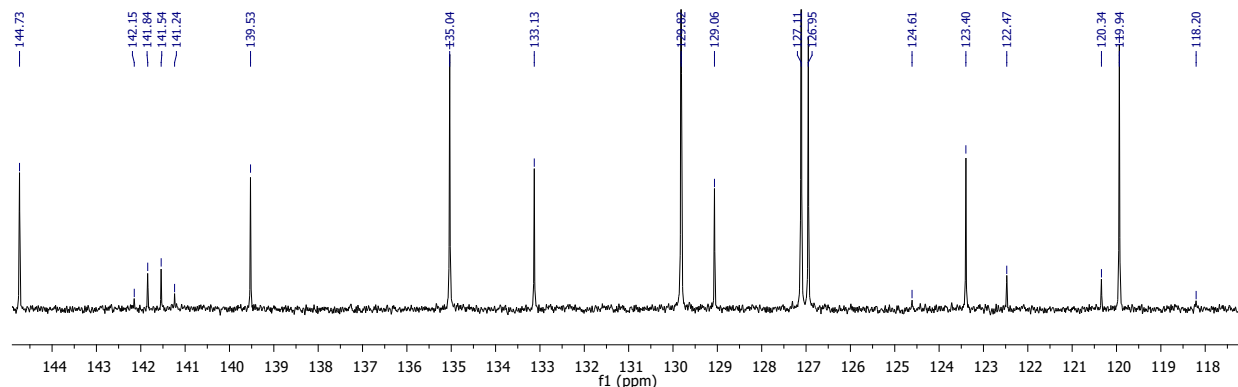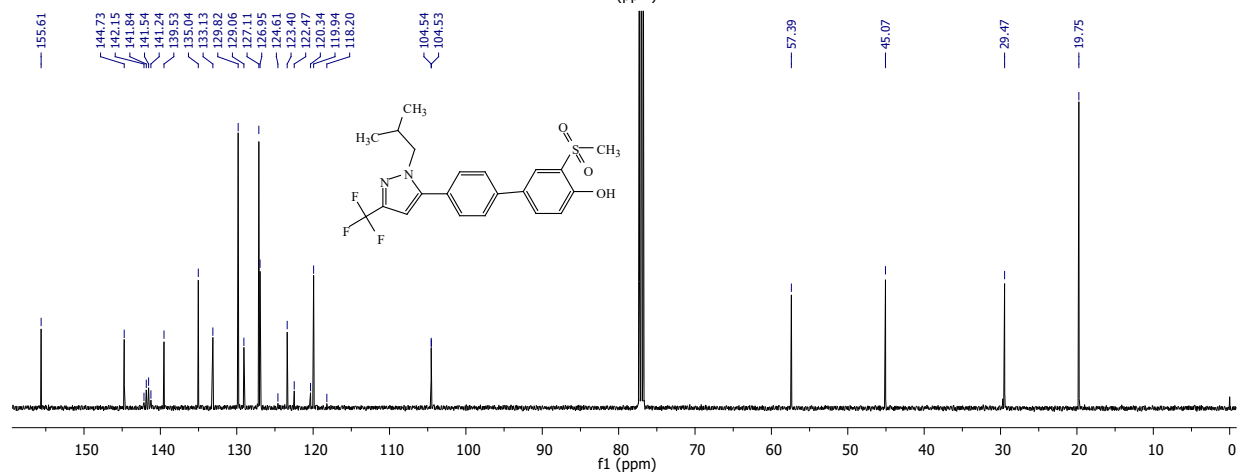

$^{13}\text{C}$  NMR spectrum (126 MHz,  $\text{CDCl}_3$ ) of 4'-(1-isobutyl-3-(trifluoromethyl)-1*H*-pyrazol-5-yl)-3-(methylsulfonyl)-[1,1'-biphenyl]-4-ol (**10a**)

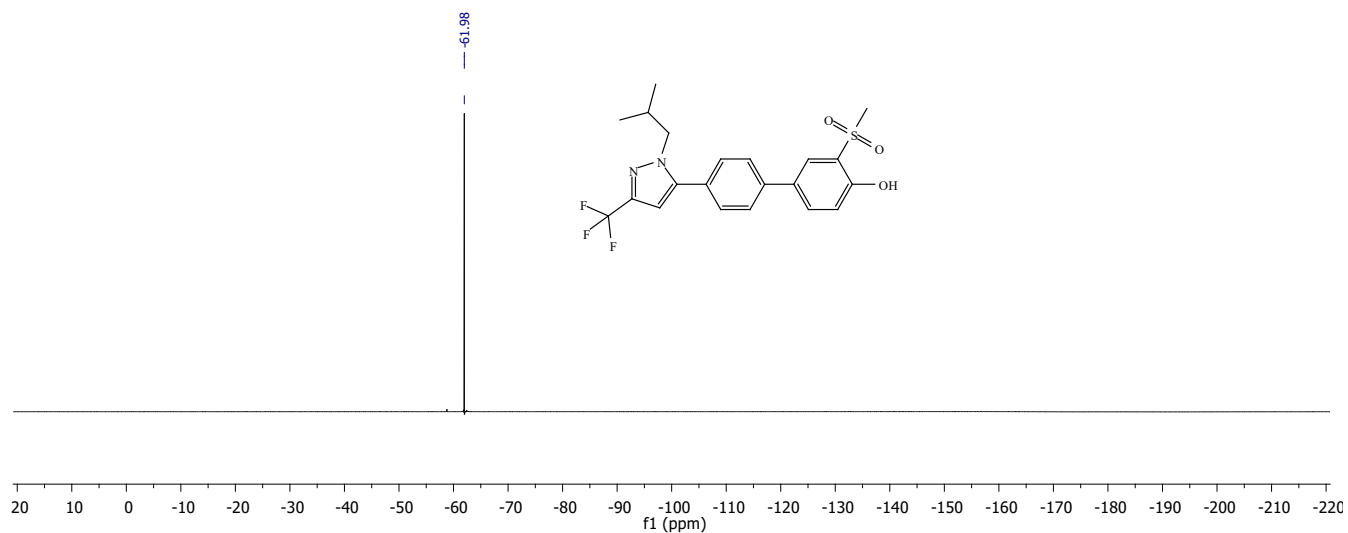

$^{19}\text{F}$  NMR spectrum (500 MHz,  $\text{CDCl}_3$ ) of 4'-(1-isobutyl-3-(trifluoromethyl)-1*H*-pyrazol-5-yl)-3-(methylsulfonyl)-[1,1'-biphenyl]-4-ol (**10a**)



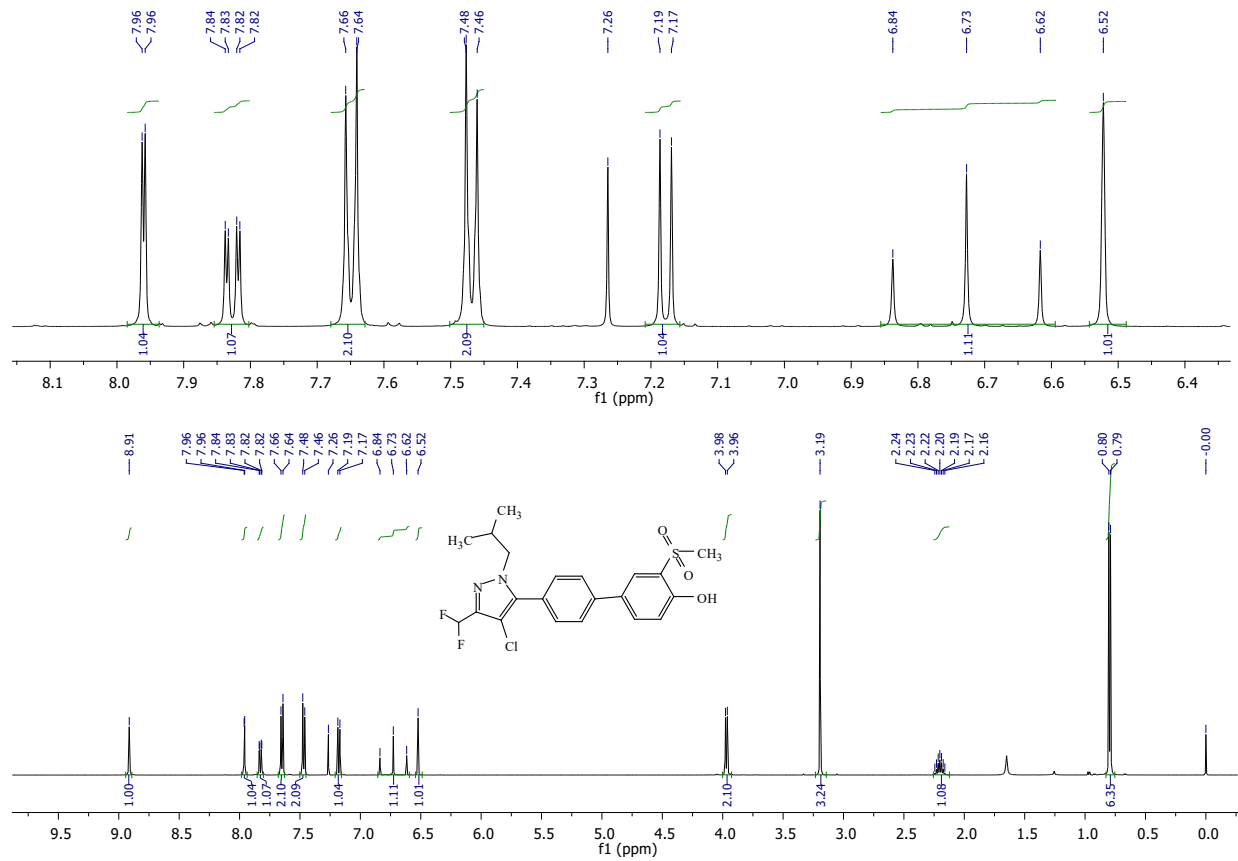

$^1\text{H}$  NMR spectrum (500 MHz,  $\text{CDCl}_3$ ) of 4'-(4-chloro-3-(difluoromethyl)-1-isobutyl-1H-pyrazol-5-yl)-3-(methylsulfonyl)-[1,1'-biphenyl]-4-ol (**10c**)

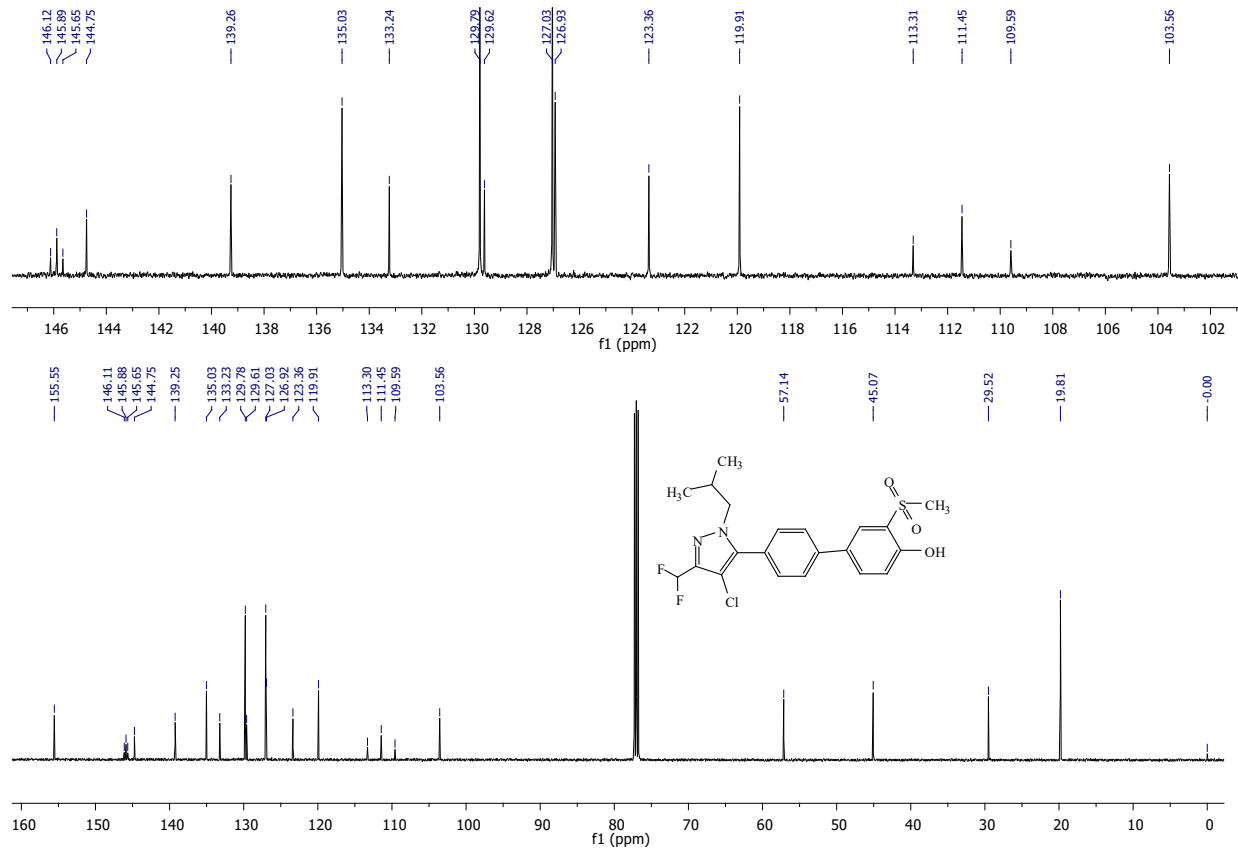

$^{13}\text{C}$  NMR spectrum (126 MHz,  $\text{CDCl}_3$ ) of 4'-(4-chloro-3-(difluoromethyl)-1-isobutyl)-1H-pyrazol-5-yl)-3-(methylsulfonyl)-[1,1'-biphenyl]-4-ol (**10c**)

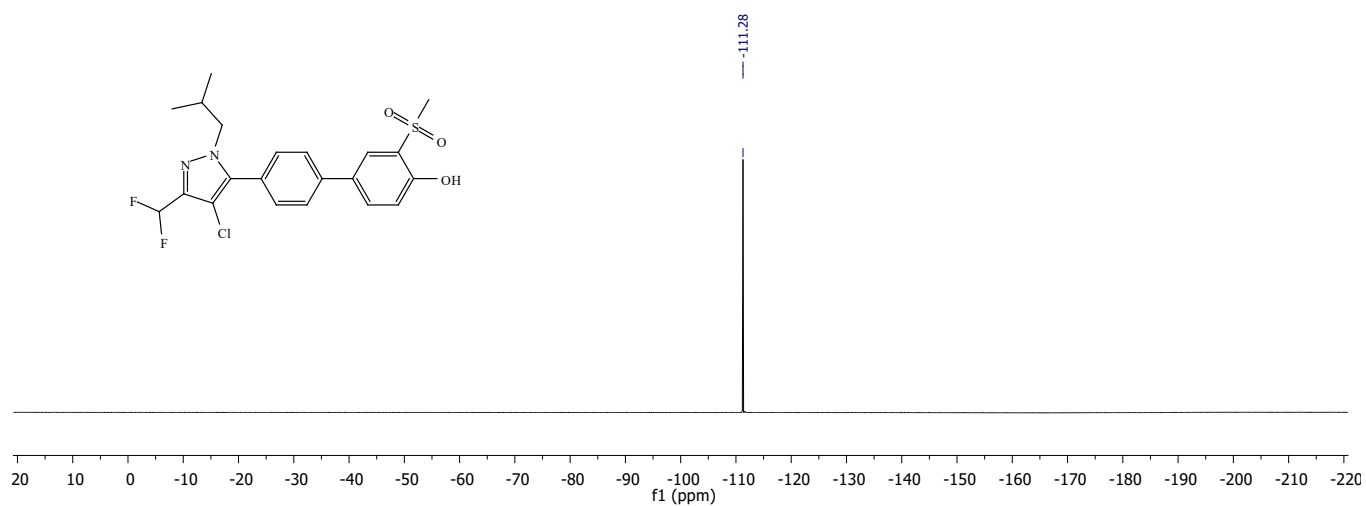

$^{19}\text{F}$  NMR spectrum (500 MHz,  $\text{CDCl}_3$ ) of 4'-(4-chloro-3-(difluoromethyl)-1-isobutyl)-1H-pyrazol-5-yl)-3-(methylsulfonyl)-[1,1'-biphenyl]-4-ol (**10c**)

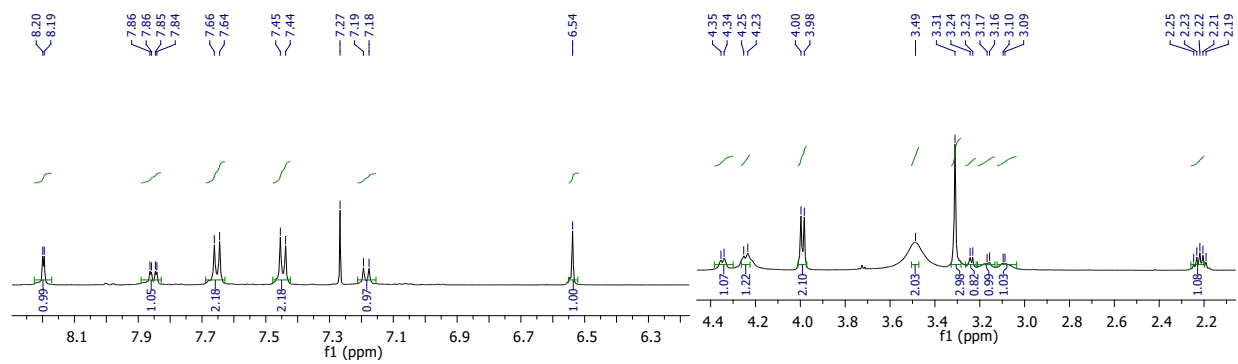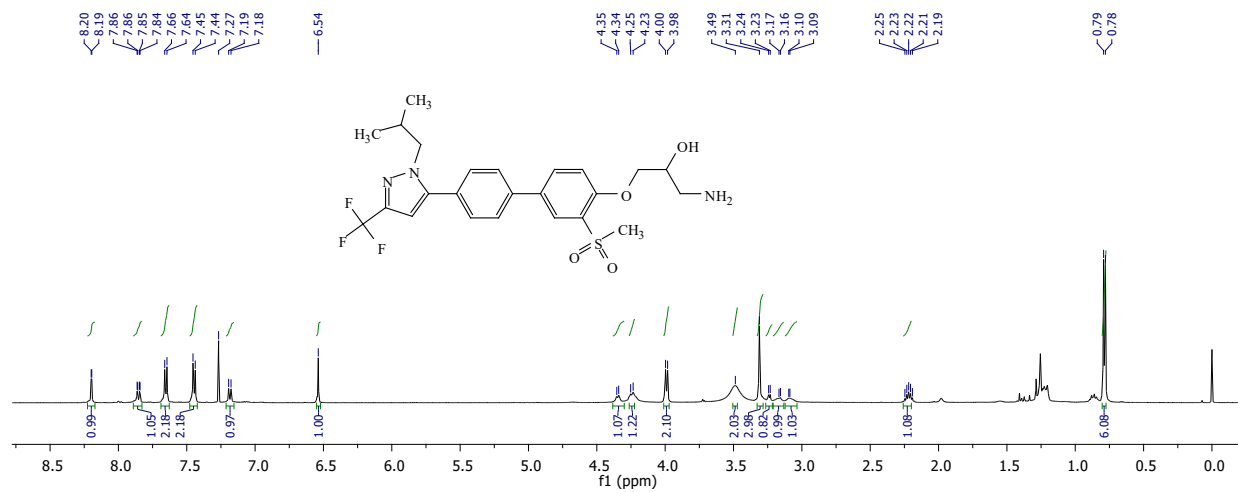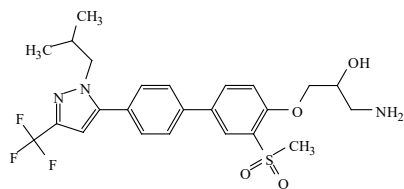

$^1\text{H}$  NMR spectrum (500 MHz,  $\text{CDCl}_3$ ) of 1-amino-3-((4'-(1-isobutyl-3-(trifluoromethyl)-1H-pyrazol-5-yl)-3-(methylsulfonyl)-[1,1'-biphenyl]-4-yl)oxy)propan-2-ol (**11a**)

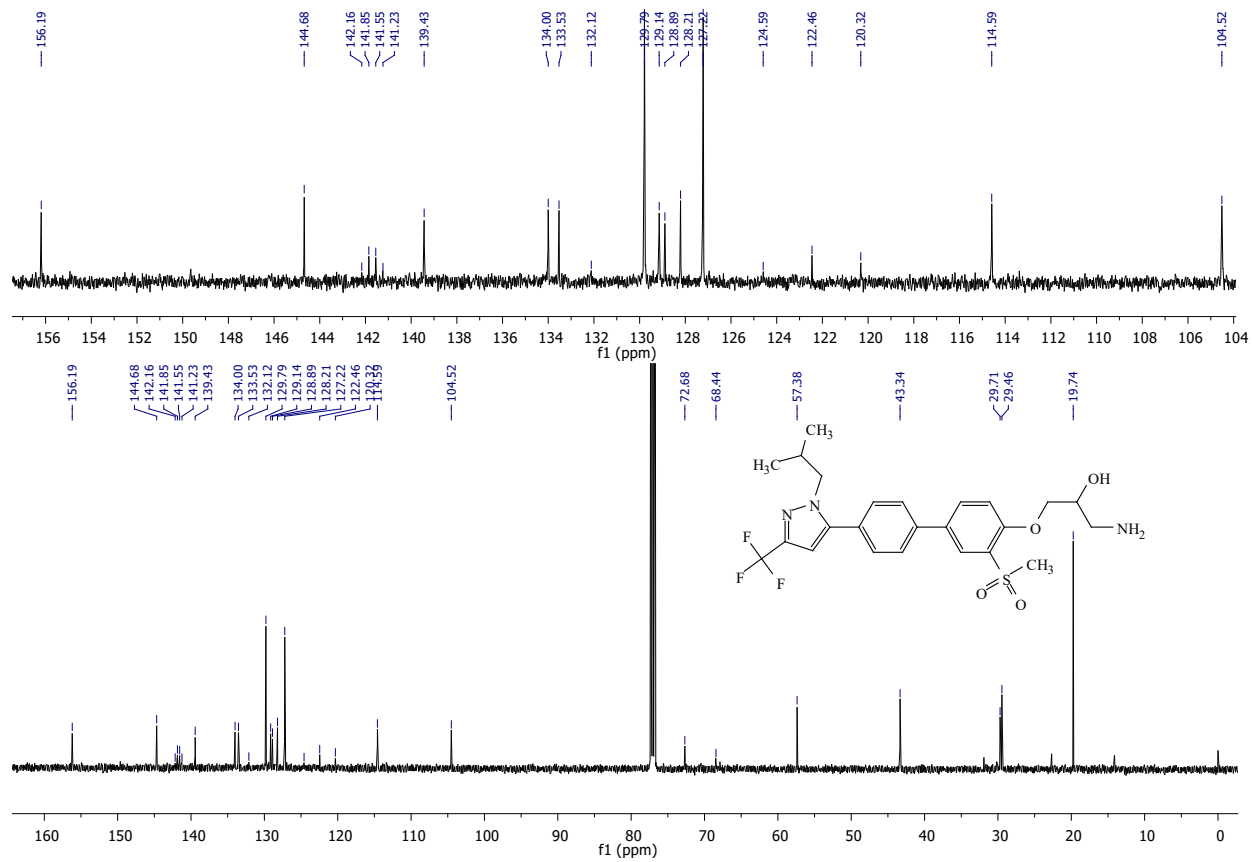

<sup>13</sup>C NMR spectrum (126 MHz, CDCl<sub>3</sub>) of 1-amino-3-((4'-(1-isobutyl-3-(trifluoromethyl)-1*H*-pyrazol-5-yl)-3-(methylsulfonyl)-[1,1'-biphenyl]-4-yl)oxy)propan-2-ol (**11a**)

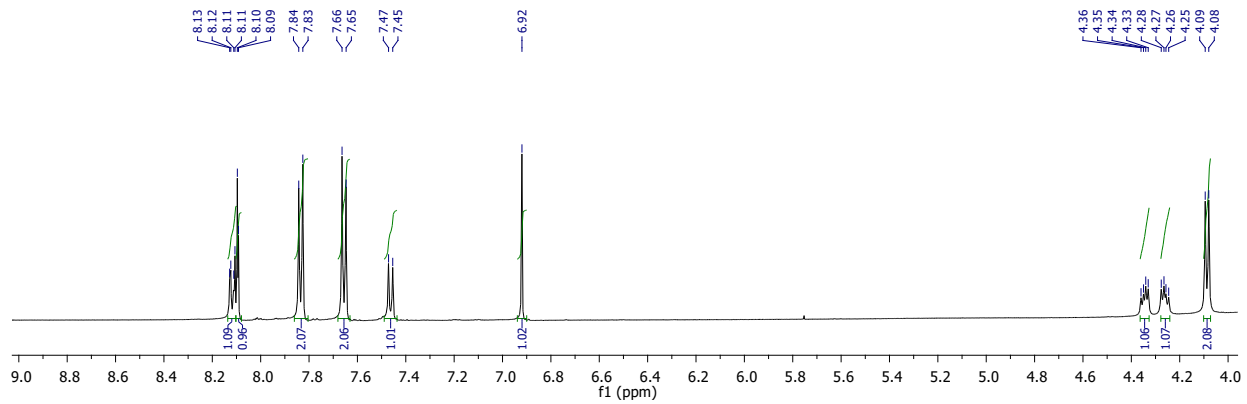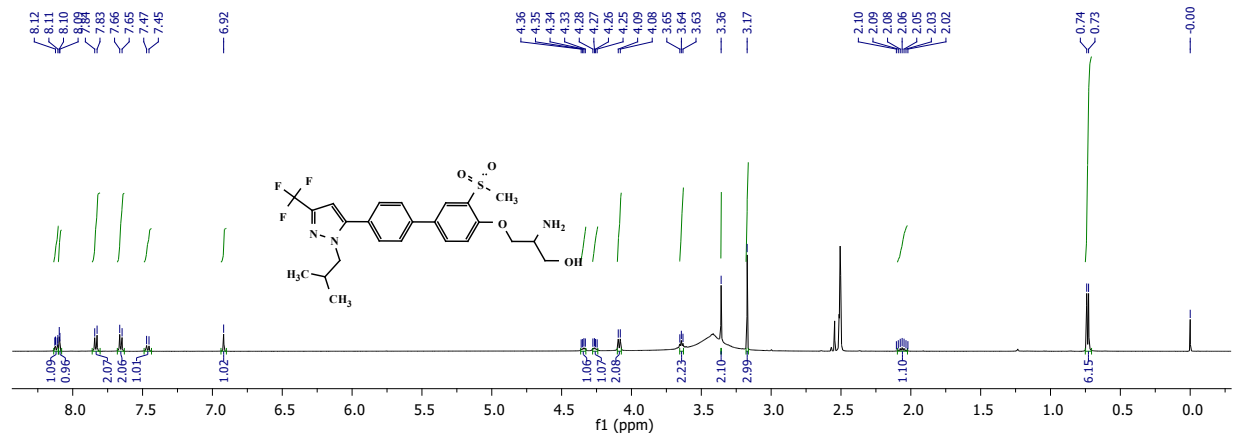

2-amino-3-((4'-(1-isobutyl-3-(trifluoromethyl)-1H-pyrazol-5-yl)-3-(methylsulfonyl)-[1,1'-biphenyl]-4-yl)oxy)propan-1-ol (**11b**)

Method:- HPLC\_X-Select(Formic acid)  
 Column : X-Select CSH C18 (4.6\*150) mm 3.5u  
 Mobile Phase: A - Acetonitrile  
                   B - 5% Phase A + 0.1% Formic acid + water  
 Inj Volume; 5.0μL,  
 Flow Rate: 1.0. mL/minute  
 Gradient program: Initial hold 95% B for 1 min., 95% B to 0 % B in 8 minute,  
                           hold till 12 min, at 15.0 min B conc is 95 % up to 18 min

Chromatogram

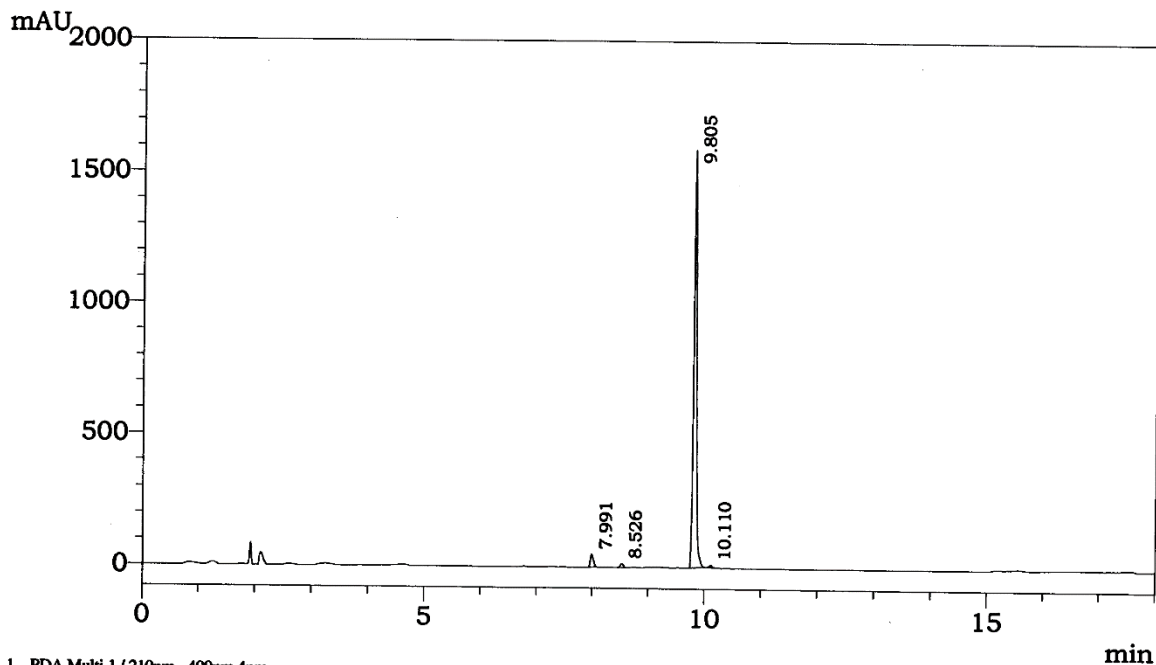

1 PDA Multi 1 / 210nm - 400nm 4nm

PeakTable

PDA Ch1 210nm - 400nm 4nm

| Peak# | Ret. Time | Area    | Area %  | Peak Purity Index |
|-------|-----------|---------|---------|-------------------|
| 1     | 7.991     | 171253  | 2.798   | 0.99999           |
| 2     | 8.526     | 50072   | 0.818   | 0.99999           |
| 3     | 9.805     | 5868283 | 95.877  | 0.98761           |
| 4     | 10.110    | 31059   | 0.507   | 0.99999           |
| Total |           | 6120668 | 100.000 |                   |

HPLC chromatogram of 1-(4'-Methoxy-3'-(methylsulfonyl)-[1,1'-biphenyl]-4-yl)-5-methyl-3-(trifluoromethyl)-1H-pyrazole (**5a**)

Method:- HPLC\_X-Select(Formic acid)  
 Column : X-Select CSH C18 (4.6\*150) mm 3.5u  
 Mobile Phase: A - Acetonitrile  
                   B - 5% Phase A + 0.1% Formic acid + water  
 Inj Volume; 5.0µL,  
 Flow Rate: 1.0. mL/minute  
 Gradient program: Initial hold 95% B for 1 min., 95% B to 0 % B in 8 minute,  
                           hold till 12 min, at 15.0 min B conc is 95 % up to 18 min

Chromatogram

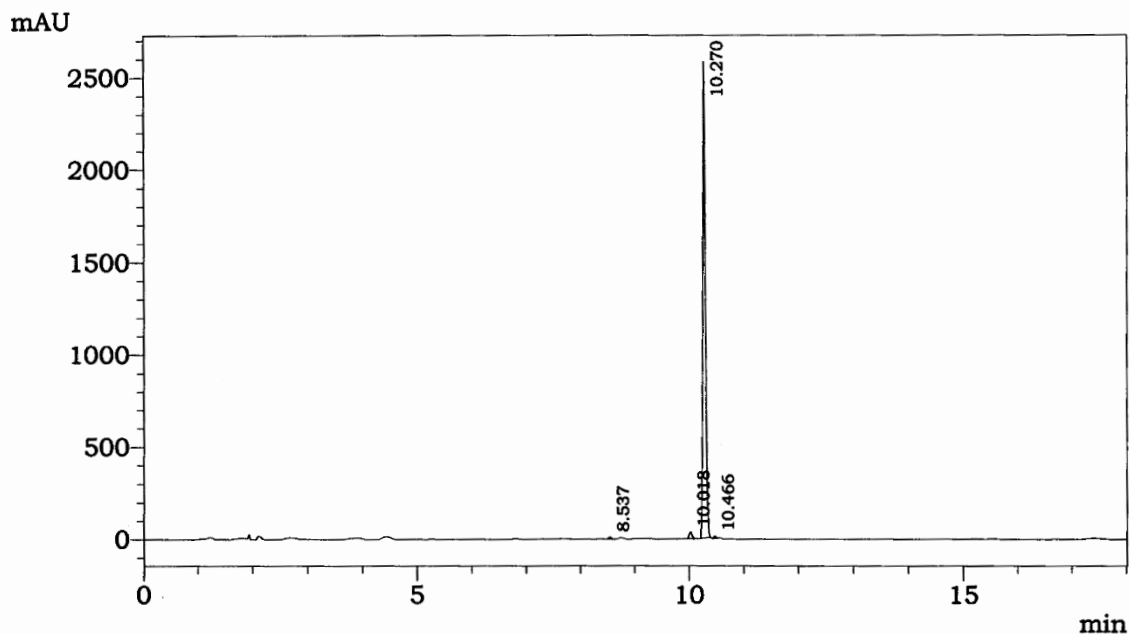

1 PDA Multi 1 / 210nm - 400nm 4nm

PeakTable

PDA Ch1 210nm - 400nm 4nm

| Peak# | Ret. Time | Area    | Area %  | Peak Purity Index |
|-------|-----------|---------|---------|-------------------|
| 1     | 8.537     | 32158   | 0.373   | 0.99997           |
| 2     | 10.018    | 122602  | 1.423   | 0.98036           |
| 3     | 10.270    | 8433977 | 97.866  | 0.96113           |
| 4     | 10.466    | 29150   | 0.338   | 0.80651           |
| Total |           | 8617888 | 100.000 |                   |

HPLC chromatogram of 1-(4'-Methoxy-3-methyl-3'-(methylsulfonyl)-[1,1'-biphenyl]-4-yl)-5-methyl-3-(trifluoromethyl)-1*H*-pyrazole (**5b**)

Method:- HPLC\_X-Select(Formic acid)  
 Column : X-Select CSH C18 (4.6\*150) mm 3.5u  
 Mobile Phase: A - Acetonitrile  
                   B - 5% Phase A + 0.1% Formic acid + water  
 Inj Volume; 5.0µL,  
 Flow Rate: 1.0. mL/minute  
 Gradient program: Initial hold 95% B for 1 min., 95% B to 0 % B in 8 minute,  
                           hold till 12 min, at 15.0 min B conc is 95 % up to 18 min

Chromatogram

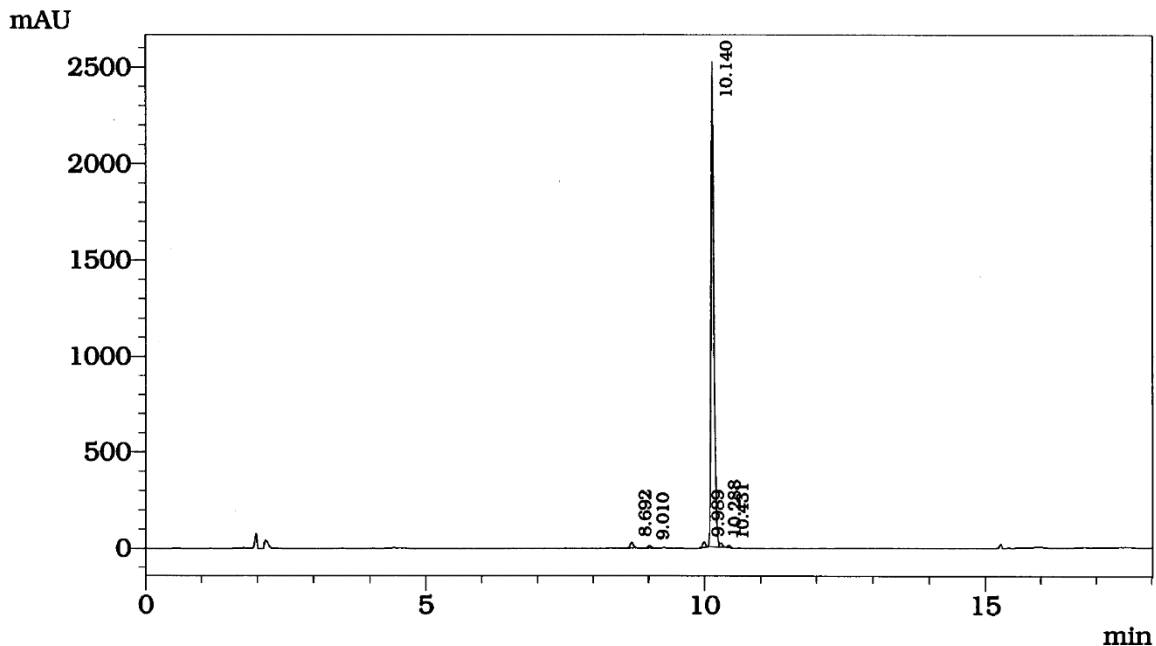

1 PDA Multi 1 / 210nm - 400nm 4nm

PeakTable

PDA Ch1 210nm - 400nm 4nm

| Peak# | Ret. Time | Area    | Area %  | Peak Purity Index |
|-------|-----------|---------|---------|-------------------|
| 1     | 8.692     | 110311  | 1.195   | 1.00000           |
| 2     | 9.010     | 46352   | 0.502   | 0.99999           |
| 3     | 9.989     | 99204   | 1.074   | 0.68321           |
| 4     | 10.140    | 8869703 | 96.048  | 0.99989           |
| 5     | 10.288    | 71056   | 0.769   | 0.98312           |
| 6     | 10.431    | 38068   | 0.412   | 0.99986           |
| Total |           | 9234694 | 100.000 |                   |

HPLC chromatogram of 1-(3-Isobutyl-4'-methoxy-3'-(methylsulfonyl)-[1,1'-biphenyl]-4-yl)-5-methyl-3-(trifluoromethyl)-1*H*-pyrazole, (5c).



Method:- HPLC\_X-Select(Formic acid)  
 Column : X-Select CSH C18 (4.6\*150) mm 3.5u  
 Mobile Phase: A - Acetonitrile  
                   B - 0.1% Formic acid+5% Acetonitrile in water  
 Inj Volume; 5.0µL,  
 Flow Rate: 1.0. mL/minute  
 Gradient program: Initial hold 95% B for 1 min., 95% B to 0 % B in 8 minute,  
                           hold till 12 min, at 15.0 min B conc is 95 % up to 18 min

Chromatogram

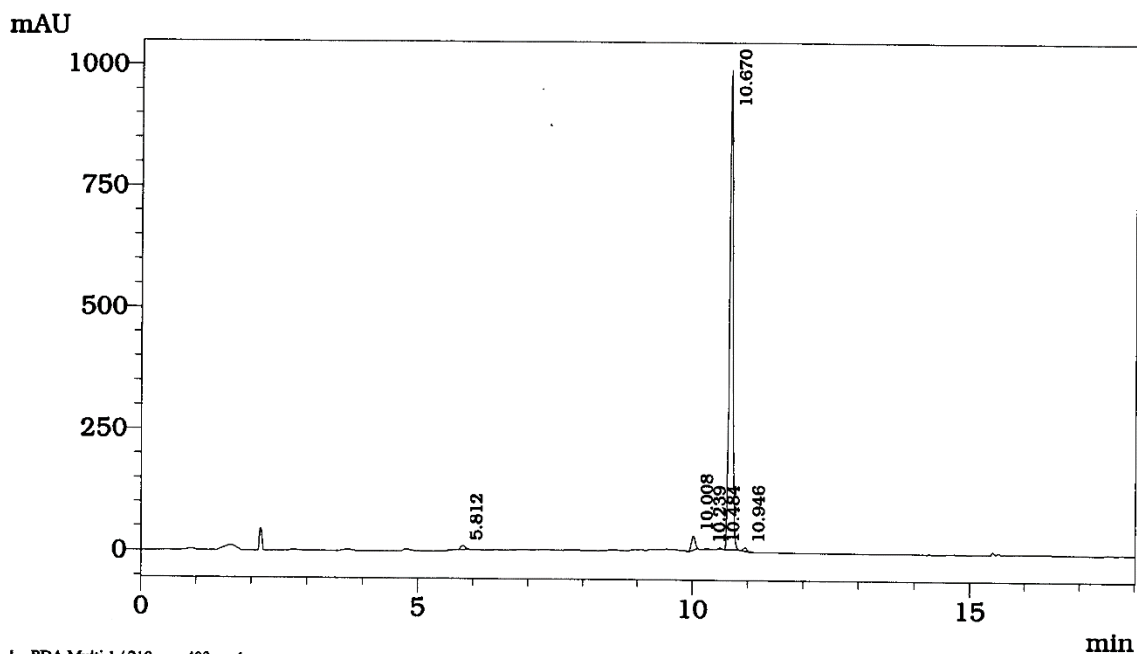

1 PDA Multi 1 / 210nm - 400nm 4nm

PeakTable

PDA Ch1 210nm - 400nm 4nm

| Peak# | Ret. Time | Area    | Area %  | Peak Purity Index |
|-------|-----------|---------|---------|-------------------|
| 1     | 5.812     | 35591   | 0.786   | 1.00000           |
| 2     | 10.008    | 127243  | 2.810   | 0.99999           |
| 3     | 10.239    | 10044   | 0.222   | 1.00000           |
| 4     | 10.484    | 7575    | 0.167   | 0.99999           |
| 5     | 10.670    | 4319693 | 95.391  | 1.00000           |
| 6     | 10.946    | 28284   | 0.625   | 0.99997           |
| Total |           | 4528429 | 100.000 |                   |

HPLC chromatogram of 1-(3-Isobutyl-4'-methoxy-3'-(methylsulfonyl)-[1,1'-biphenyl]-4-yl)-5-isopropyl-3-(trifluoromethyl)-1*H*-pyrazole, (**5e**)

Method:- HPLC\_X-Select(Formic acid)  
 Column : X-Select CSH C18 (4.6\*150) mm 3.5u  
 Mobile Phase: A - Acetonitrile  
                   B - 5% Phase A + 0.1% Formic acid + water  
 Inj Volume; 5.0µL,  
 Flow Rate: 1.0. mL/minute  
 Gradient program: Initial hold 95% B for 1 min., 95% B to 0 % B in 8 minute,  
                           hold till 12 min, at 15.0 min B conc is 95 % up to 18 min

Chromatogram

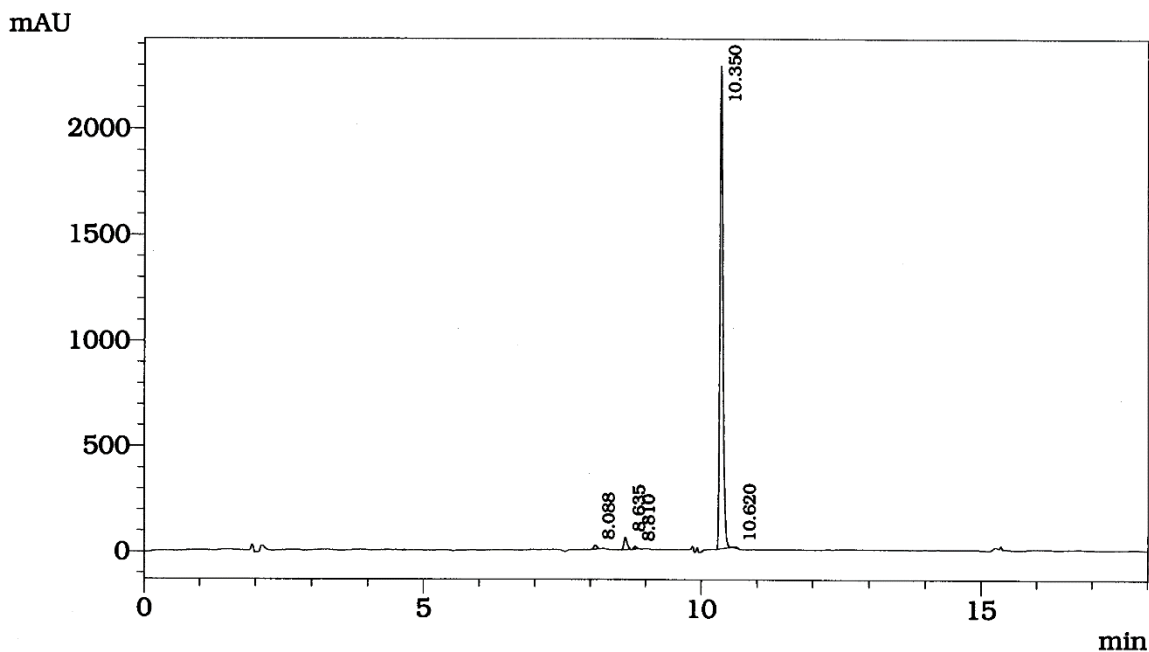

1 PDA Multi 1 / 210nm - 400nm 4nm

PeakTable

PDA Ch1 210nm - 400nm 4nm

| Peak# | Ret. Time | Area    | Area %  | Peak Purity Index |
|-------|-----------|---------|---------|-------------------|
| 1     | 8.088     | 76943   | 0.855   | 0.99995           |
| 2     | 8.635     | 219997  | 2.445   | 1.00000           |
| 3     | 8.810     | 42374   | 0.471   | 1.00000           |
| 4     | 10.350    | 8644767 | 96.076  | 1.00000           |
| 5     | 10.620    | 13805   | 0.153   | 0.99483           |
| Total |           | 8997886 | 100.000 |                   |

HPLC chromatogram of 5-Cyclopropyl-1-(3-isobutyl-4'-methoxy-3'-(methylsulfonyl)-[1,1'-biphenyl]-4-yl)-3-(trifluoromethyl)-1*H*-pyrazole, (**5f**)

Method:- HPLC\_X-Select(Formic acid)  
 Column : X-Select CSH C18 (4.6\*150) mm 3.5u  
 Mobile Phase: A - Acetonitrile  
                   B - 5% Phase A + 0.1% Formic acid + water  
 Inj Volume; 5.0µL,  
 Flow Rate: 1.0. mL/minute  
 Gradient program: Initial hold 95% B for 1 min., 95% B to 0 % B in 8 minute,  
                           hold till 12 min, at 15.0 min B conc is 95 % up to 18 min

Chromatogram

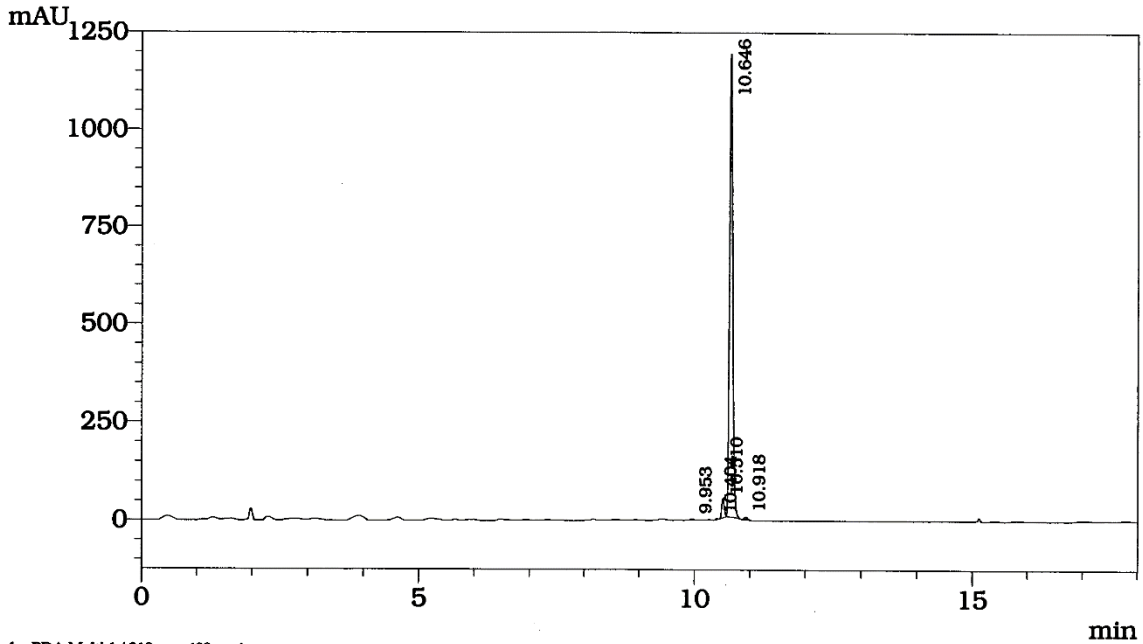

1 PDA Multi 1 / 210nm - 400nm 4nm

PeakTable

PDA Ch1 210nm - 400nm 4nm

| Peak# | Ret. Time | Area    | Area %  | Peak Purity Index |
|-------|-----------|---------|---------|-------------------|
| 1     | 9.953     | 7777    | 0.164   | 1.00000           |
| 2     | 10.404    | 6660    | 0.140   | 0.99989           |
| 3     | 10.510    | 166533  | 3.505   | 0.99760           |
| 4     | 10.646    | 4547119 | 95.705  | 1.00000           |
| 5     | 10.918    | 23084   | 0.486   | 0.99999           |
| Total |           | 4751173 | 100.000 |                   |

HPLC chromatogram of 5-Cyclobutyl-1-(3-isobutyl-4'-methoxy-3'-(methylsulfonyl)-[1,1'-biphenyl]-4-yl)-3-(trifluoromethyl)-1*H*-pyrazole (**5g**).

Method:- HPLC\_X-Select(Formic acid)  
 Column : X-Select CSH C18 (4.6\*150) mm 3.5u  
 Mobile Phase: A - Acetonitrile  
                   B - 0.1% Formic acid+5% Acetonitrile in water  
 Inj Volume; 5.0µL,  
 Flow Rate: 1.0. mL/minute  
 Gradient program: Initial hold 95% B for 1 min., 95% B to 0 % B in 8 minute,  
                           hold till 12 min, at 15.0 min B conc is 95 % up to 18 min

Chromatogram

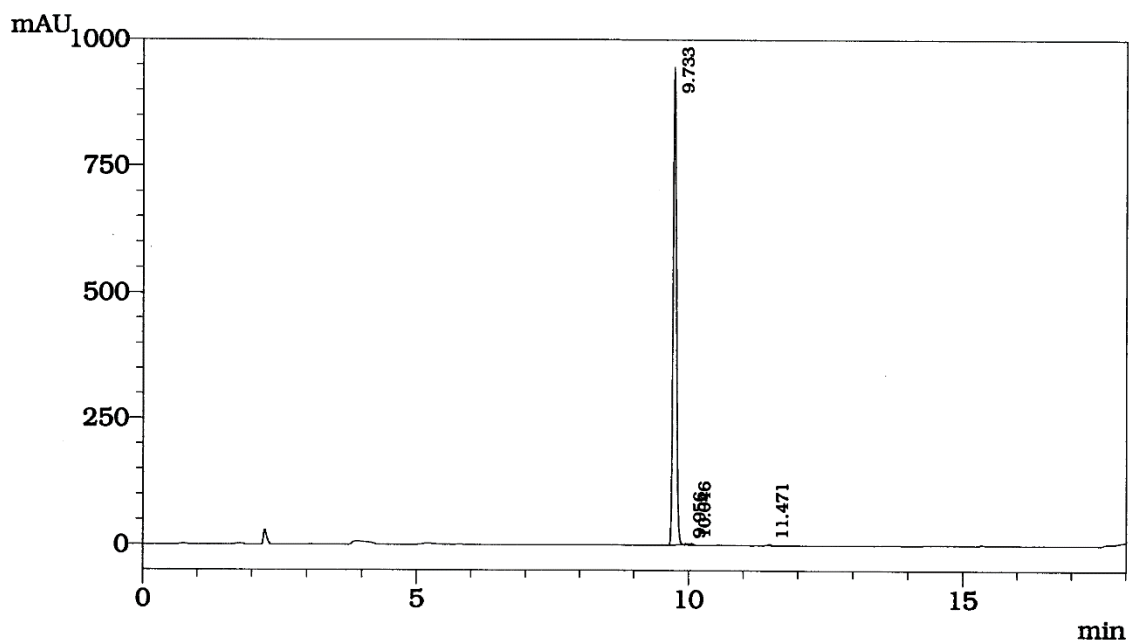

1 PDA Multi 1 / 210nm - 400nm 4nm

PeakTable

PDA Ch1 210nm - 400nm 4nm

| Peak# | Ret. Time | Area    | Area %  | Peak Purity Index |
|-------|-----------|---------|---------|-------------------|
| 1     | 9.733     | 3923559 | 99.310  | 1.00000           |
| 2     | 9.956     | 9507    | 0.241   | 0.87776           |
| 3     | 10.046    | 10395   | 0.263   | 0.32045           |
| 4     | 11.471    | 7342    | 0.186   | 0.99994           |
| Total |           | 3950803 | 100.000 |                   |

HPLC chromatogram of 3'-Isobutyl-4'-(5-methyl-3-(trifluoromethyl)-1*H*-pyrazol-1-yl)-3-(methylsulfonyl)-[1,1'-biphenyl]-4-ol (**6a**).

Method:- HPLC\_X-Bridge(NH3)  
 Column : X-Bridge C18 (4.6\*150) mm 3.5u  
 Mobile Phase: A - Acetonitrile  
                   B - 0.1% NH3 in water  
 Inj Volume; 5.0μL,  
 Flow Rate: 1.0. mL/minute  
 Gradient program: Initial 98% B to 15 % B in 6 minute, hold till 8 min,  
                           at 9.0 min B conc is 0 % hold up to 12 min., at 14 min B conc. 98% hold

Chromatogram

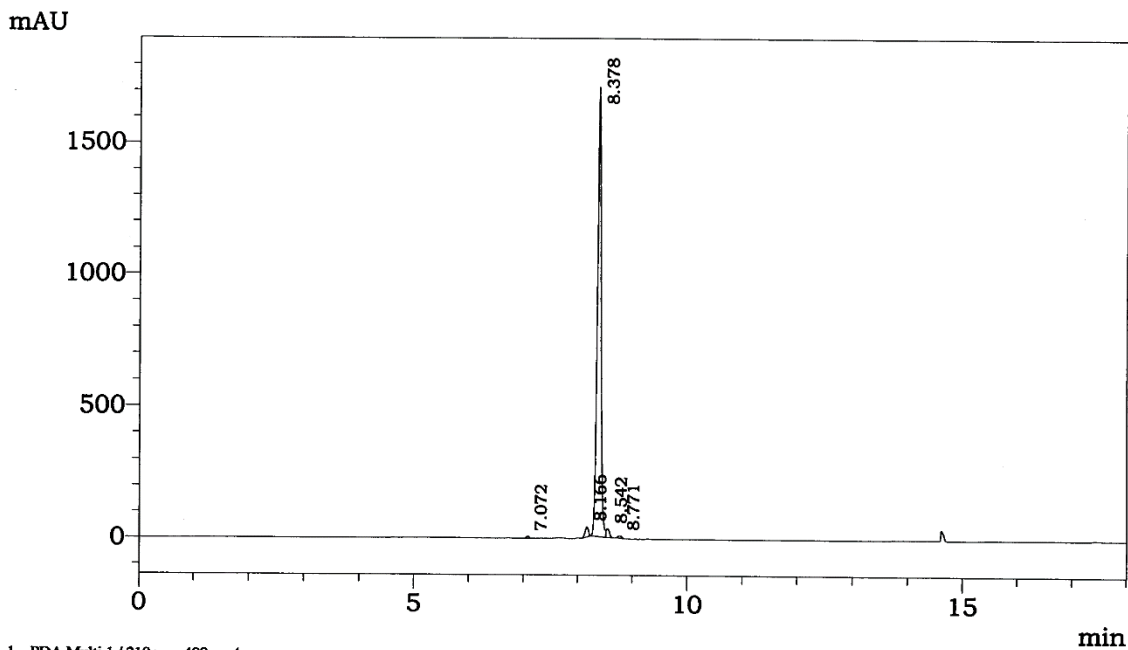

1 PDA Multi 1 / 210nm - 400nm 4nm

PeakTable

PDA Ch1 210nm - 400nm 4nm

| Peak# | Ret. Time | Area    | Area %  | Peak Purity Index |
|-------|-----------|---------|---------|-------------------|
| 1     | 7.072     | 27628   | 0.319   | 0.99994           |
| 2     | 8.166     | 164373  | 1.895   | 1.00000           |
| 3     | 8.378     | 8303200 | 95.736  | 1.00000           |
| 4     | 8.542     | 132102  | 1.523   | 0.99998           |
| 5     | 8.771     | 45754   | 0.528   | 0.99998           |
| Total |           | 8673057 | 100.000 |                   |

HPLC chromatogram of 4-(2-((3'-Isobutyl-4'-(5-methyl-3-(trifluoromethyl)-1*H*-pyrazol-1-yl)-3-(methylsulfonyl)-[1,1'-biphenyl]-4-yl)oxy)ethyl)morpholine (**6b**).

Method:- HPLC\_X-Select(Formic acid)  
 Column : X-Select CSH C18 (4.6\*150) mm 3.5u  
 Mobile Phase: A - Acetonitrile  
                   B - 0.1% Formic acid+5% Acetonitrile in water  
 Inj Volume; 5.0µL,  
 Flow Rate: 1.0. mL/minute  
 Gradient program: Initial hold 95% B for 1 min., 95% B to 0 % B in 8 minute,  
                           hold till 12 min, at 15.0 min B conc is 95 % up to 18 min

Chromatogram

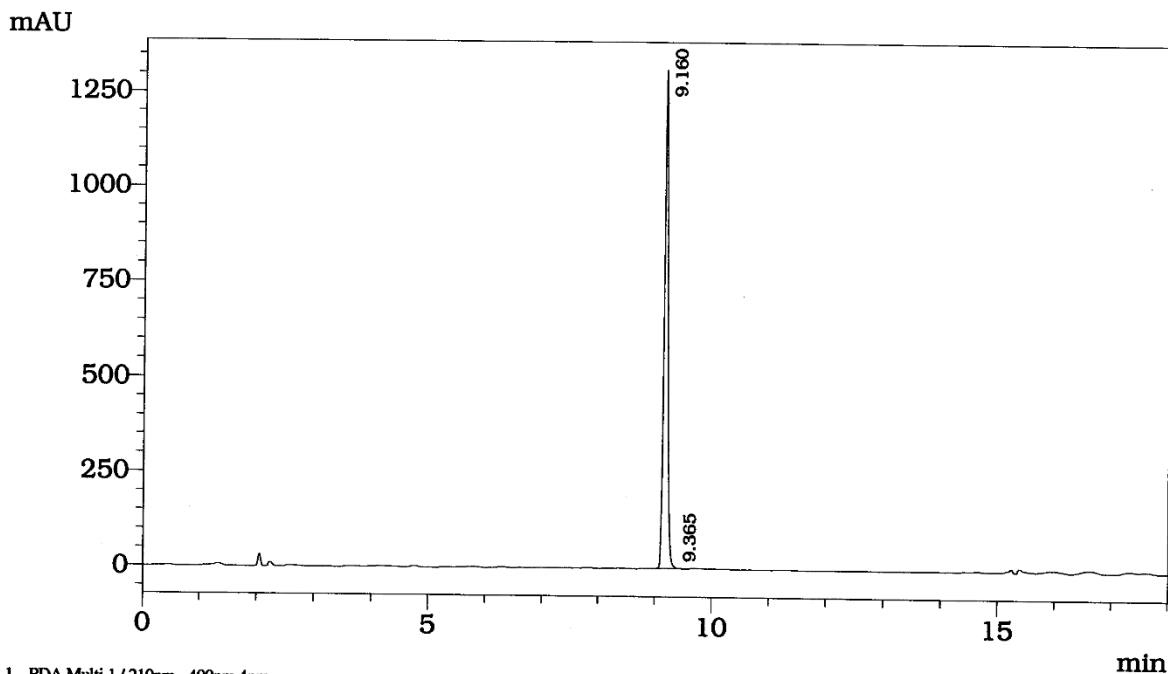

1 PDA.Multi 1/210nm - 400nm 4nm

PeakTable

PDA Ch1 210nm - 400nm 4nm

| Peak# | Ret. Time | Area    | Area %  | Peak Purity Index |
|-------|-----------|---------|---------|-------------------|
| 1     | 9.160     | 6209957 | 99.936  | 1.00000           |
| 2     | 9.365     | 3988    | 0.064   | 0.99955           |
| Total |           | 6213945 | 100.000 |                   |

HPLC chromatogram of 5-((3'-Isobutyl-4'-(5-methyl-3-(trifluoromethyl)-1*H*-pyrazol-1-yl)-3-(methylsulfonyl)-[1,1'-biphenyl]-4-yl)oxy)piperidin-2-one (**6c**).

Method:- HPLC\_X-Select(Formic acid)  
 Column : X-Select CSH C18 (4.6\*150) mm 3.5u  
 Mobile Phase: A - Acetonitrile  
                   B - 0.1% Formic acid+5% Acetonitrile in water  
 Inj Volume; 5.0µL,  
 Flow Rate: 1.0. mL/minute  
 Gradient program: Initial hold 95% B for 1 min., 95% B to 0 % B in 8 minute,  
                           hold till 12 min, at 15.0 min B conc is 95 % up to 18 min

Chromatogram

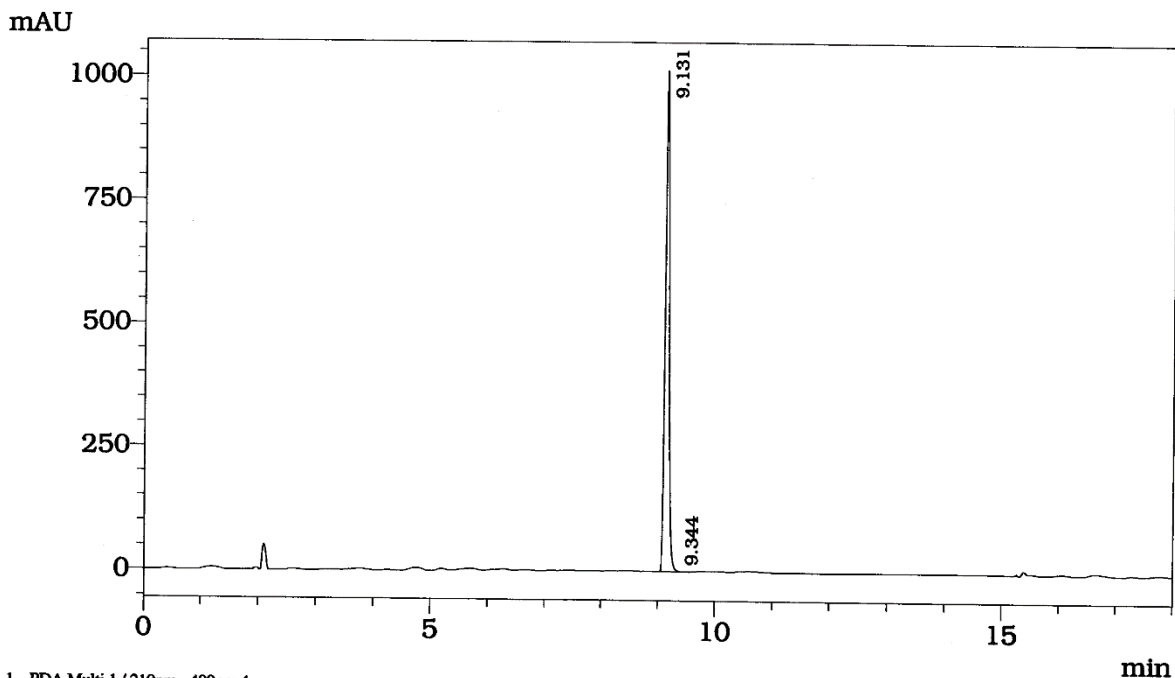

1 PDA Multi 1 / 210nm - 400nm 4nm

PeakTable

PDA Ch1 210nm - 400nm 4nm

| Peak# | Ret. Time | Area    | Area %  | Peak Purity Index |
|-------|-----------|---------|---------|-------------------|
| 1     | 9.131     | 4843445 | 99.920  | 1.00000           |
| 2     | 9.344     | 3854    | 0.080   | 0.99696           |
| Total |           | 4847299 | 100.000 |                   |

HPLC chromatogram of 4-((3'-Isobutyl-4'-(5-methyl-3-(trifluoromethyl)-1*H*-pyrazol-1-yl)-3-(methylsulfonyl)-[1,1'-biphenyl]-4-yl)oxy)pyrrolidin-2-one (**6d**).

Method:- HPLC\_X-Select(Formic acid)  
 Column : X-Select CSH C18 (4.6\*150) mm 3.5u  
 Mobile Phase: A - Acetonitrile  
                   B - 0.1% Formic acid+5% Acetonitrile in water  
 Inj Volume; 5.0µL,  
 Flow Rate: 1.0. mL/minute  
 Gradient program: Initial hold 95% B for 1 min., 95% B to 0 % B in 8 minute,  
                           hold till 12 min, at 15.0 min B conc is 95 % up to 18 min

Chromatogram

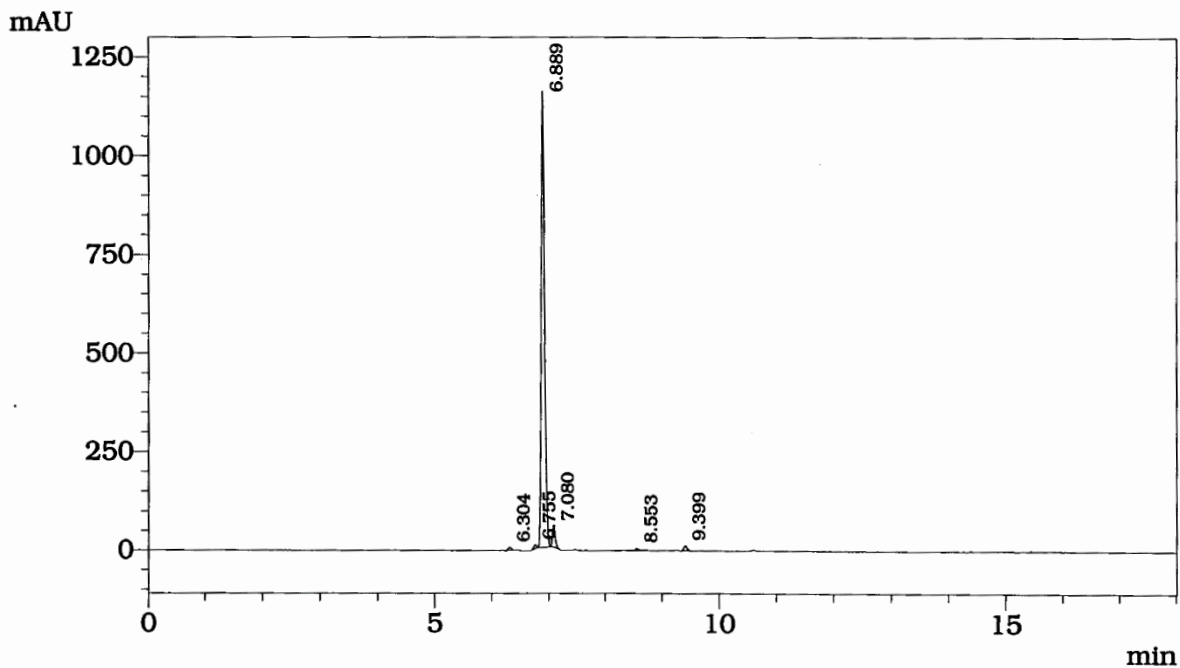

1 PDA Multi 1 / 210nm - 400nm 4nm

PeakTable

PDA Ch1 210nm - 400nm 4nm

| Peak# | Ret. Time | Area    | Area %  | Peak Purity Index |
|-------|-----------|---------|---------|-------------------|
| 1     | 6.304     | 27040   | 0.542   | 0.99983           |
| 2     | 6.755     | 32442   | 0.651   | 0.99983           |
| 3     | 6.889     | 4683632 | 93.932  | 1.00000           |
| 4     | 7.080     | 178949  | 3.589   | 1.00000           |
| 5     | 8.553     | 17014   | 0.341   | 1.00000           |
| 6     | 9.399     | 47091   | 0.944   | 0.99997           |
| Total |           | 4986168 | 100.000 |                   |

HPLC chromatogram of 1-Amino-3-((3'-isobutyl-4'-(5-methyl-3-(trifluoromethyl)-1*H*-pyrazol-1-yl)-3-(methylsulfonyl)-[1,1'-biphenyl]-4-yl)oxy)propan-2-ol (**6e**).



Method:- HPLC\_X-Select(Formic acid)  
 Column : X-Select CSH C18 (4.6\*150) mm 3.5u  
 Mobile Phase: A - Acetonitrile  
                   B - 0.1% Formic acid+5% Acetonitrile in water  
 Inj Volume; 5.0µL,  
 Flow Rate: 1.0. mL/minute  
 Gradient program: Initial hold 95% B for 1 min., 95% B to 0 % B in 8 minute,  
                           hold till 12 min, at 15.0 min B conc is 95 % up to 18 min

Chromatogram

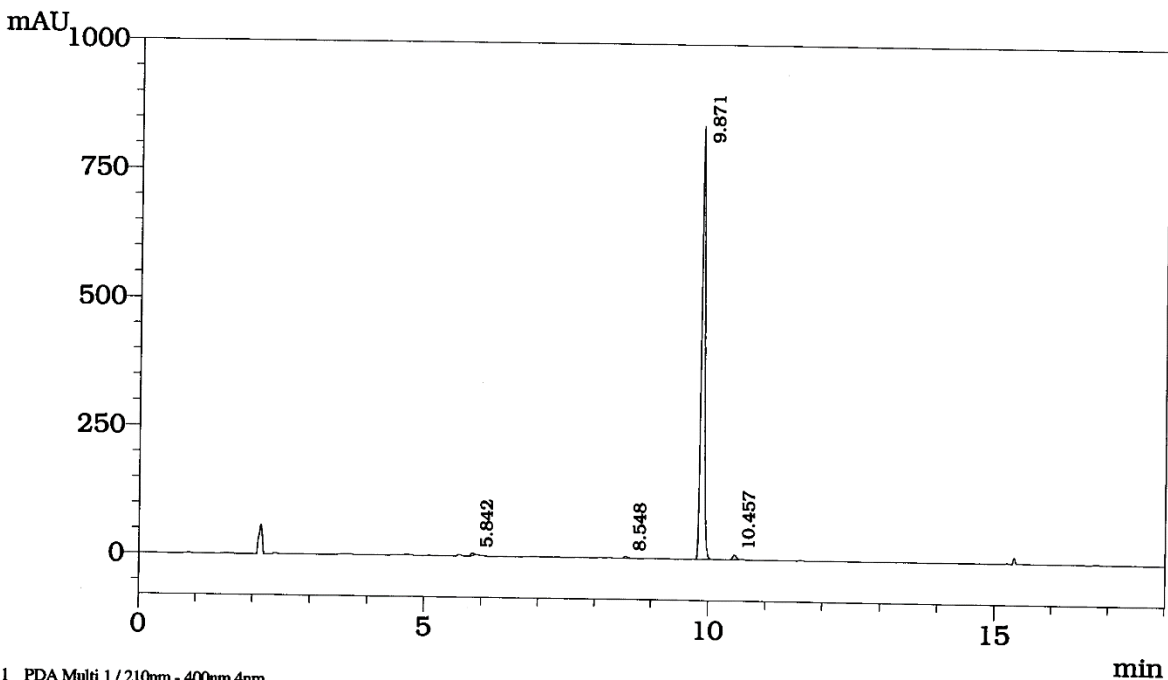

1 PDA Multi 1 / 210nm - 400nm 4nm

PeakTable

PDA Ch1 210nm - 400nm 4nm

| Peak# | Ret. Time | Area    | Area %  | Peak Purity Index |
|-------|-----------|---------|---------|-------------------|
| 1     | 5.842     | 19844   | 0.533   | 0.99997           |
| 2     | 8.548     | 17084   | 0.458   | 0.99997           |
| 3     | 9.871     | 3647546 | 97.884  | 1.00000           |
| 4     | 10.457    | 41938   | 1.125   | 0.99991           |
| Total |           | 3726412 | 100.000 |                   |

HPLC chromatogram of 1-Isobutyl-5-(4'-methoxy-3'-(methylsulfonyl)-[1,1'-biphenyl]-4-yl)-3-(trifluoromethyl)-1H-pyrazole (**9a**).



Method:- HPLC\_X-Select(Formic acid)  
 Column : X-Select CSH C18 (4.6\*150) mm 3.5u  
 Mobile Phase: A - Acetonitrile  
                   B - 5% Phase A + 0.1% Formic acid + water  
 Inj Volume; 5.0µL,  
 Flow Rate: 1.0. mL/minute  
 Gradient program: Initial hold 95% B for 1 min., 95% B to 0 % B in 8 minute,  
                           hold till 12 min, at 15.0 min B conc is 95 % up to 18 min

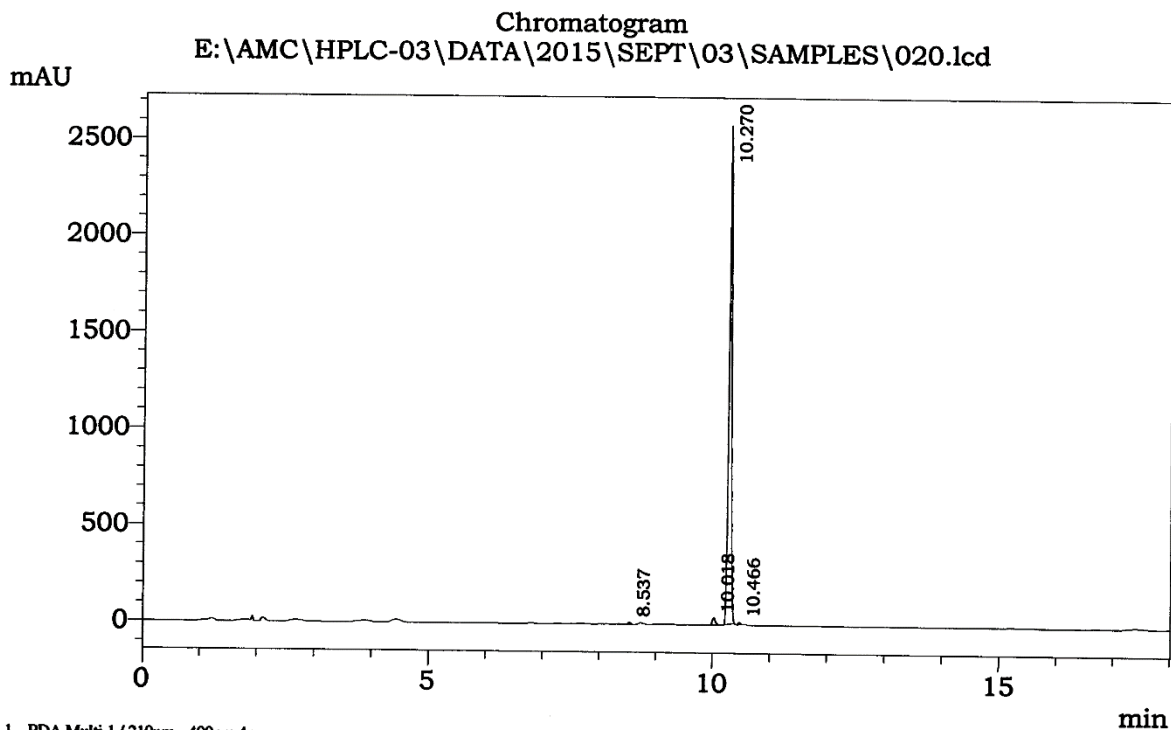

PeakTable

PDA Ch1 210nm - 400nm 4nm

| Peak# | Ret. Time | Area    | Area %  | Peak Purity Index |
|-------|-----------|---------|---------|-------------------|
| 1     | 8.537     | 32158   | 0.373   | 0.99997           |
| 2     | 10.018    | 122602  | 1.423   | 0.98036           |
| 3     | 10.270    | 8433977 | 97.866  | 0.96113           |
| 4     | 10.466    | 29150   | 0.338   | 0.80651           |
| Total |           | 8617888 | 100.000 |                   |

HPLC chromatogram of 4-Chloro-3-(difluoromethyl)-1-isobutyl-5-(4'-methoxy-3'-(methylsulfonyl)-[1,1'-biphenyl]-4-yl)-1*H*-pyrazole (**9c**)

Method:- HPLC\_X-Select(Formic acid)  
 Column : X-Select CSH C18 (4.6\*150) mm 3.5u  
 Mobile Phase: A - Acetonitrile  
                   B - 0.1% Formic acid+5% Acetonitrile in water  
 Inj Volume; 5.0µL,  
 Flow Rate: 1.0. mL/minute  
 Gradient program: Initial hold 95% B for 1 min., 95% B to 0 % B in 8 minute,  
                           hold till 12 min, at 15.0 min B conc is 95 % up to 18 min

Chromatogram

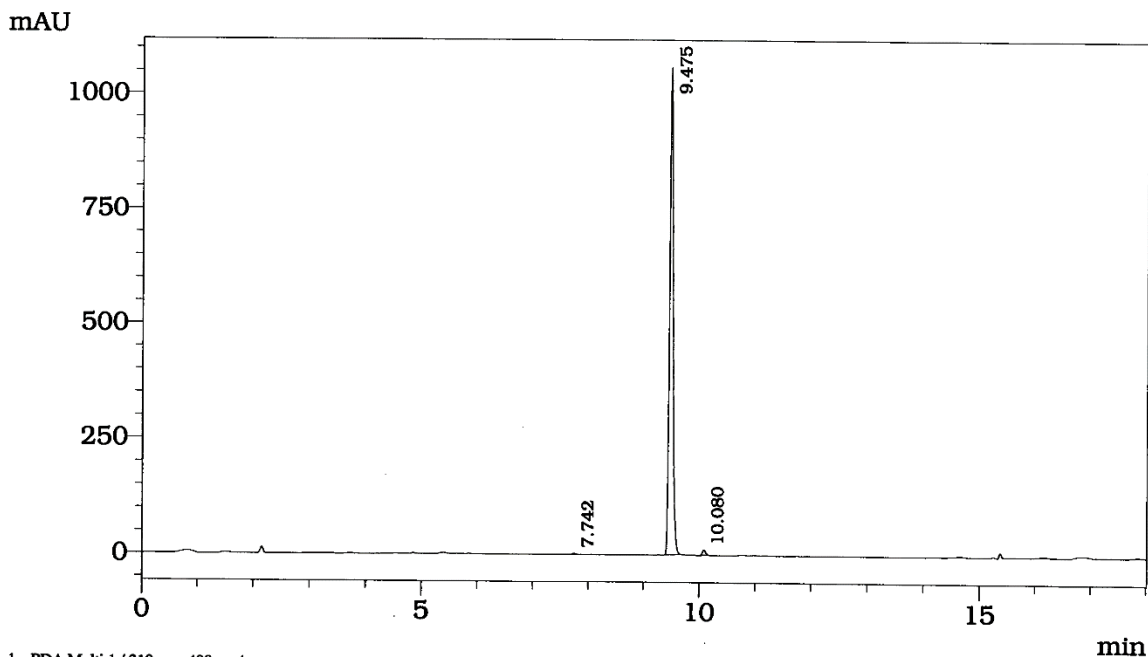

1 PDA Multi 1 / 210nm - 400nm 4nm

PeakTable

PDA Ch1 210nm - 400nm 4nm

| Peak# | Ret. Time | Area    | Area %  | Peak Purity Index |
|-------|-----------|---------|---------|-------------------|
| 1     | 7.742     | 9242    | 0.191   | 0.99999           |
| 2     | 9.475     | 4772508 | 98.840  | 1.00000           |
| 3     | 10.080    | 46761   | 0.968   | 1.00000           |
| Total |           | 4828511 | 100.000 |                   |

HPLC chromatogram of 4'-(1-Isobutyl-3-(trifluoromethyl)-1*H*-pyrazol-5-yl)-3-(methylsulfonyl)-[1,1'-biphenyl]-4-ol (**10a**)

Method:- HPLC\_X-Select(Formic acid)  
 Column : X-Select CSH C18 (4.6\*150) mm 3.5u  
 Mobile Phase: A - Acetonitrile  
                   B - 5% Phase A + 0.1% Formic acid + water  
 Inj Volume; 5.0µL,  
 Flow Rate: 1.0. mL/minute  
 Gradient program: Initial hold 95% B for 1 min., 95% B to 0 % B in 8 minute,  
                           hold till 12 min, at 15.0 min B conc is 95 % up to 18 min

Chromatogram

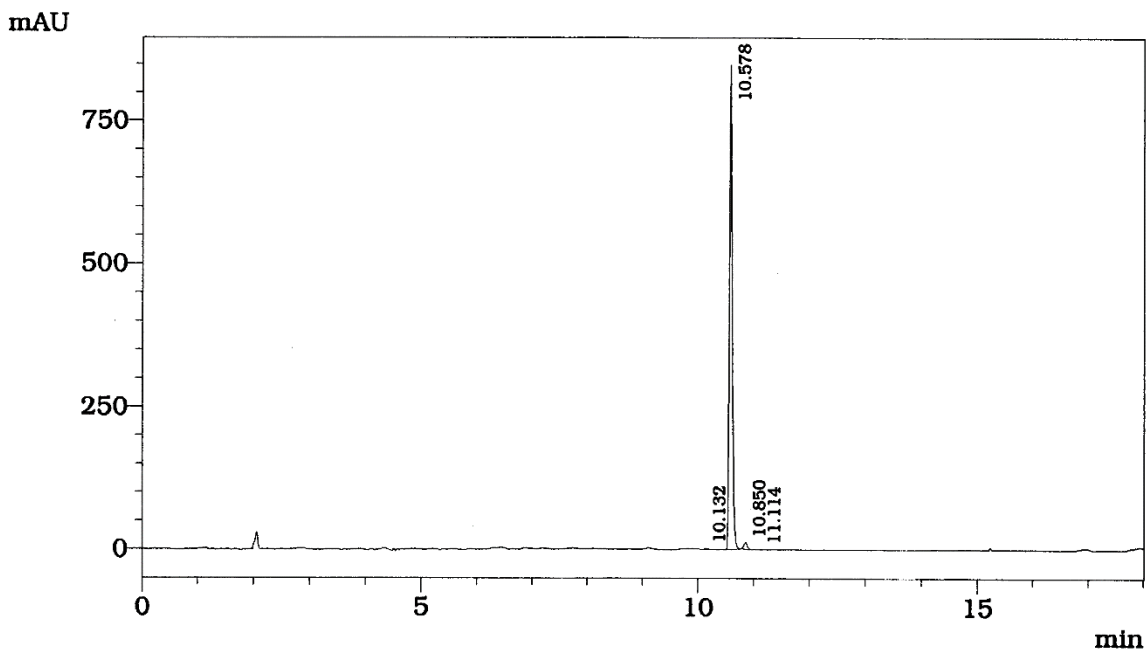

1 PDA Multi 1 / 210nm - 400nm 4nm

PeakTable

PDA Ch1 210nm - 400nm 4nm

| Peak# | Ret. Time | Area    | Area %  | Peak Purity Index    |
|-------|-----------|---------|---------|----------------------|
| 1     | 10.132    | 3182    | 0.105   | Cannot be calculated |
| 2     | 10.578    | 2975452 | 98.436  | 1.00000              |
| 3     | 10.850    | 42366   | 1.402   | 0.99992              |
| 4     | 11.114    | 1729    | 0.057   | Cannot be calculated |
| Total |           | 3022730 | 100.000 |                      |

HPLC chromatogram of 4'-(4-Chloro-1-isobutyl-3-(trifluoromethyl)-1*H*-pyrazol-5-yl)-3-(methylsulfonyl)-[1,1'-biphenyl]-4-ol, (**10b**)

HPLC chromatogram of (10c)

Method:- HPLC\_X-Select(Formic acid)  
 Column : X-Select CSH C18 (4.6\*150) mm 3.5u  
 Mobile Phase: A - Acetonitrile  
                   B - 0.1% Formic acid+5% Acetonitrile in water  
 Inj Volume; 5.0µL,  
 Flow Rate: 1.0. mL/minute  
 Gradient program: Initial hold 95% B for 1 min., 95% B to 0 % B in 8 minute,  
                           hold till 12 min, at 15.0 min B conc is 95 % up to 18 min

Chromatogram

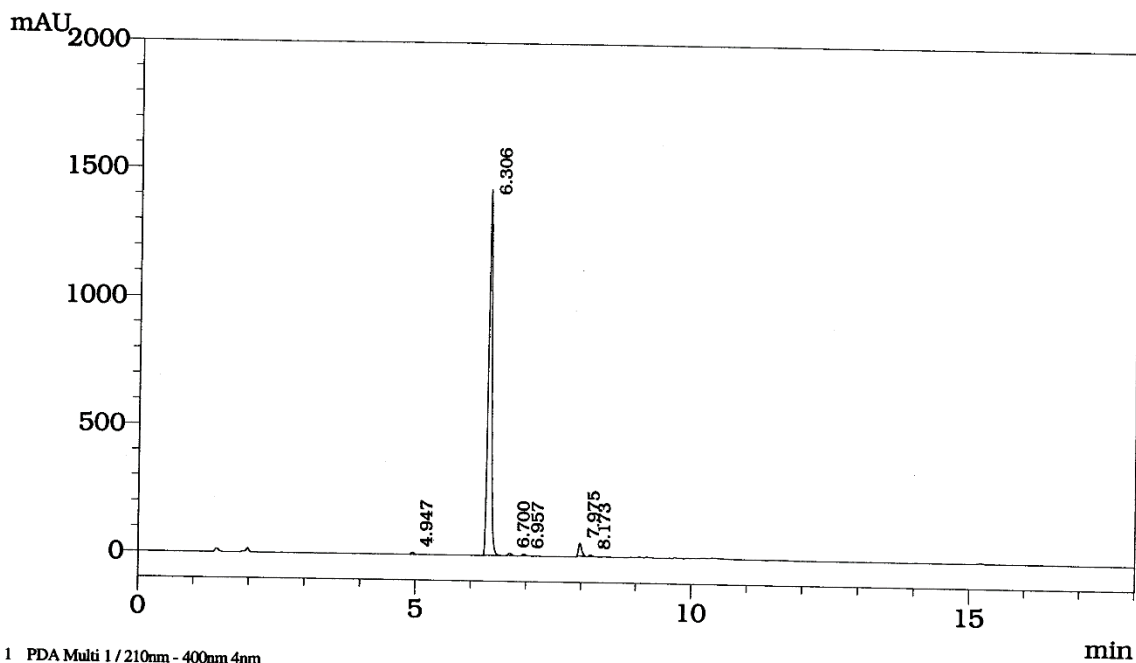

1 PDA Multi 1 / 210nm - 400nm 4nm

PeakTable

PDA Ch1 210nm - 400nm 4nm

| Peak# | Ret. Time | Area    | Area %  | Peak Purity Index |
|-------|-----------|---------|---------|-------------------|
| 1     | 4.947     | 27535   | 0.432   | 0.99999           |
| 2     | 6.306     | 6075243 | 95.315  | 1.00000           |
| 3     | 6.700     | 33311   | 0.523   | 0.99990           |
| 4     | 6.957     | 19225   | 0.302   | 0.99982           |
| 5     | 7.975     | 200952  | 3.153   | 1.00000           |
| 6     | 8.173     | 17615   | 0.276   | 0.99981           |
| Total |           | 6373881 | 100.000 |                   |

HPLC chromatogram of 1-Amino-3-((4'-(1-isobutyl-3-(trifluoromethyl)-1H-pyrazol-5-yl)-3-(methylsulfonyl)-[1,1'-biphenyl]-4-yl)oxy)propan-2-ol (**11a**).

**Method:- HPLC\_X-Select(Formic acid)**  
**Column : X-Select CSH C18 (4.6\*150) mm 3.5u**  
**Mobile Phase: A - Acetonitrile**  
**B - 0.1% Formic acid+5% Acetonitrile in water**  
**Inj Volume; 5.0µL,**  
**Flow Rate: 1.0. mL/minute**  
**Gradient program: Initial hold 95% B for 1 min., 95% B to 0 % B in 8 minute,**  
**hold till 12 min, at 15.0 min B conc is 95 % up to 18 min**

**Chromatogram**

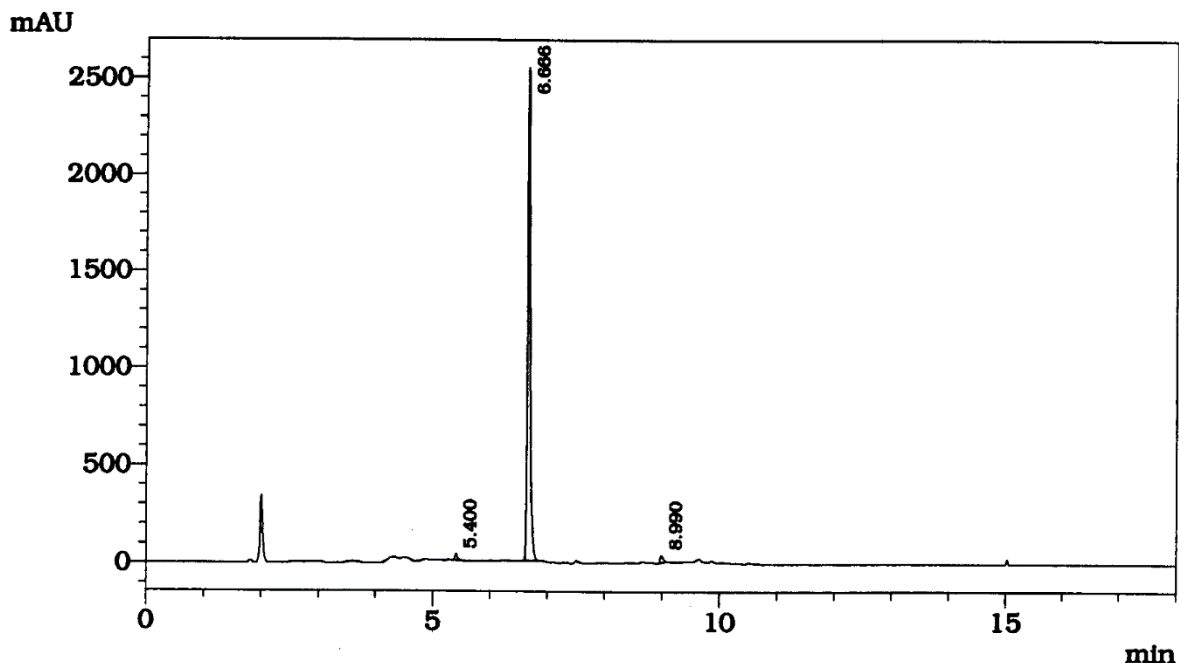

1 PDA Multi 1 / 210nm - 400nm 4nm

**PeakTable**  
PDA Ch1 210nm - 400nm 4nm

| Peak#        | Ret. Time | Area           | Area %         | Peak Purity Index |
|--------------|-----------|----------------|----------------|-------------------|
| 1            | 5.400     | 91238          | 1.095          | 0.99999           |
| 2            | 6.666     | 8105251        | 97.256         | 0.99891           |
| 3            | 8.990     | 137484         | 1.650          | 0.97315           |
| <b>Total</b> |           | <b>8333974</b> | <b>100.000</b> |                   |

HPLC chromatogram of 2-amino-3-((4'-(1-isobutyl-3-(trifluoromethyl)-1*H*-pyrazol-5-yl)-3-(methylsulfonyl)-[1,1'-biphenyl]-4-yl)oxy)propan-1-ol (**11b**)
